# Supplementary material for: Shifts in Lichen Species and Functional Diversity in a Primeval Forest Ecosystem as a Response to Environmental Changes
Source: MDPI journal article supplement (doi:10.3390/f12060686), 2021-05-27
Supplement: s1 [file s1]

**Table S1.** List of species recorded in the study area.

| Table 51. List of species recorded in the study area.       |         |         |                               |                                          |                                 |                               |                     |                                       |                                 |                                                         |                                                   |                                           |                                                                                  |                               |                      |                                      |                         |                                    |          |
|-------------------------------------------------------------|---------|---------|-------------------------------|------------------------------------------|---------------------------------|-------------------------------|---------------------|---------------------------------------|---------------------------------|---------------------------------------------------------|---------------------------------------------------|-------------------------------------------|----------------------------------------------------------------------------------|-------------------------------|----------------------|--------------------------------------|-------------------------|------------------------------------|----------|
| Species                                                     | Abbr.   | L_light | T_K_<br>mp<br>era<br>tur<br>e | co<br>nti<br>ne<br>nta<br>ure<br>on<br>e | M_R_<br>ist<br>cti<br>rog<br>en | N_<br>rea<br>nit<br>rog<br>en | Thal<br>lus<br>type | Asco<br>mata.<br>type<br>orma<br>tion | Spo<br>res<br>sept<br>atio<br>n | Asexu<br>al.repr<br>oducti<br>on.of.b<br>oth.bio<br>nts | Asexual.<br>reprodu<br>ction.of.<br>mycobio<br>nt | Ascomat<br>a.texture.<br>pigmenta<br>tion | Spores.dar<br>k.pigmenta<br>tion                                                 | Secondar<br>y.metabol<br>ites | Photobiont<br>.type  | Ascomata<br>area mm <sup>2</sup>     | Spore<br>shape<br>nm/nm | Spore<br>volume<br>µm <sup>3</sup> |          |
| <i>Acrocordia<br/>gemmata</i> (Ach.) A.<br>Massal.          | Acr.gem | 5       | 6                             | 3                                        | 6                               | 6                             | 2                   | crust<br>ose                          | perith<br>ecia                  | 2-<br>celle<br>d                                        | absent                                            | pycnidia                                  | ascomata<br>with<br>carbonize<br>d<br>structures                                 | spores not<br>pigmented       | no<br>substance<br>s | <i>Trentepohli<br/>a</i>             | 0,44178609<br>3         | 2,1                                | 1099,875 |
| <i>Alyxoria varia</i><br>(Pers.) Ertz &<br>Tehler s.l.      | Aly.var | 4       | 6                             | 4                                        | 5                               | 6                             | 3                   | crust<br>ose                          | lirella                         | mult<br>i-<br>celle<br>d                                | absent                                            | pycnidia                                  | ascomata<br>with<br>carbonize<br>d<br>structures<br>+ascomat<br>a with<br>pruina | spores not<br>pigmented       | no<br>substance<br>s | <i>Trentepohli<br/>a</i>             | 0,4398226               | 3,8                                | 839,6367 |
| <i>Amandinea<br/>punctata</i> (Hoffm.)<br>Coppins & Scheid. | Ama.pun | 7       |                               | 6                                        | 3                               | 5                             | 7                   | crust<br>ose                          | Lecid<br>ea                     | 2-<br>celle<br>d                                        | absent                                            | pycnidia                                  | ascomata<br>with<br>carbonize<br>d<br>structures                                 | spores<br>pigmented           | no<br>substance<br>s | chlorococco<br>id and other<br>green | 0,1256636               | 1,96428<br>5714                    | 352,8766 |
| <i>Anaptychia ciliaris</i><br>(L.) Körb.                    | Ana.cil | 7       | 5                             | 5                                        | 5                               | 7                             | 4                   | frutic<br>ose                         | Lecan<br>ora                    | 2-<br>celle<br>d                                        | absent                                            | pycnidia                                  | ascomata<br>with<br>carbonize<br>d<br>structures<br>+ascomat<br>a with<br>pruina | spores<br>pigmented           | no<br>substance<br>s | chlorococco<br>id and other<br>green | 9,62111937<br>5         | 1,90476<br>1904                    | 9 238,95 |
| <i>Anisomeridium<br/>biforme</i> (Borrer)<br>R. C. Harris   | Ani.bif |         |                               |                                          |                                 |                               |                     | crust<br>ose                          | perith<br>ecia                  | 2-<br>celle<br>d                                        | absent                                            | pycnidia                                  | ascomata<br>with<br>carbonize<br>d<br>structures                                 | spores not<br>pigmented       | no<br>substance<br>s | <i>Trentepohli<br/>a</i>             | 0,09621119<br>3         | 2,66666<br>6667                    | 202,102  |
| <i>Arthonia</i>                                             | Art.art |         |                               |                                          |                                 |                               |                     | crust                                 | artho                           | mult                                                    | absent                                            | absent                                    | ascomata                                                                         | spores not                    | no                   | <i>Trentepohli</i>                   | 0,11044652              | 3,11111                            | 148,4831 |

|                                                             |         |   |   |   |   |   |   |              |              |                          |                  |          |                                                     |                         |                                      |                                      |                 |                 |           |      |  |
|-------------------------------------------------------------|---------|---|---|---|---|---|---|--------------|--------------|--------------------------|------------------|----------|-----------------------------------------------------|-------------------------|--------------------------------------|--------------------------------------|-----------------|-----------------|-----------|------|--|
| <i>arthonioides</i><br>(Ach.) A.L. Sm.                      |         |   |   |   |   |   |   |              | ose          | nia                      | i-<br>celle<br>d |          |                                                     |                         | with<br>carbonize<br>d<br>structures | pigmented                            | substance<br>s  | <i>a</i>        | 3         | 1111 |  |
| <i>Arthonia atra</i><br>(Pers.) A. Schneid                  | Art.atr | 4 | 6 | 3 | 4 | 5 | 3 | crust<br>ose | artho<br>nia | mult<br>i-<br>celle<br>d | absent           | absent   | ascomata<br>with<br>carbonize<br>d<br>structures    | spores not<br>pigmented | no<br>substance<br>s                 | <i>Trentepohli<br/>a</i>             | 0,15904299<br>4 | 4,76923<br>0769 | 96,2391   |      |  |
| <i>Arthonia didyma</i><br>Körb.                             | Art.did |   |   |   |   |   |   | crust<br>ose | artho<br>nia | 2-<br>celle<br>d         | absent           | absent   | ascomata<br>without<br>carbonize<br>d<br>structures | spores not<br>pigmented | no<br>substance<br>s                 | <i>Trentepohli<br/>a</i>             | 0,04665261<br>1 | 2,64957<br>2649 | 277,8225  |      |  |
| <i>Arthonia radiata</i><br>(Pers.) Ach.                     | Art.rad | 3 | 5 | 4 | 4 | 5 | 4 | crust<br>ose | artho<br>nia | mult<br>i-<br>celle<br>d | absent           | absent   | ascomata<br>with<br>carbonize<br>d<br>structures    | spores not<br>pigmented | no<br>substance<br>s                 | <i>Trentepohli<br/>a</i>             | 0,17720531<br>1 | 3,33333<br>3333 | 252,6275  |      |  |
| <i>Arthonia vinosa</i><br>Leight.                           | Art.vin | 3 | 5 | 5 | 6 | 3 | 1 | crust<br>ose | artho<br>nia | 2-<br>celle<br>d         | absent           | pycnidia | ascomata<br>without<br>carbonize<br>d<br>structures | spores not<br>pigmented | antraquin<br>oses                    | chlorococco<br>id and other<br>green | 0,09621119<br>4 | 2,88888<br>8888 | 137,8772  |      |  |
| <i>Arthothelium<br/>ruanum</i> (A.<br>Massal.) Körb.        | Ath.rua | 3 | 6 | 2 | 4 | 5 | 3 | crust<br>ose | artho<br>nia | muri<br>form             | absent           | pycnidia | ascomata<br>with<br>carbonize<br>d<br>structures    | spores<br>pigmented     | no<br>substance<br>s                 | <i>Trentepohli<br/>a</i>             | 0,86590074<br>4 | 2,48484<br>8485 | 730,7786  |      |  |
| <i>Arthothelium<br/>spectabile</i> A.<br>Massal.            | Ath.spe | 3 | 7 | 2 | 4 | 5 | 3 | crust<br>ose | artho<br>nia | muri<br>form             | absent           | absent   | ascomata<br>with<br>carbonize<br>d<br>structures    | spores<br>pigmented     | no<br>substance<br>s                 | <i>Trentepohli<br/>a</i>             | 0,56744969<br>4 | 2,29629<br>6296 | 2959,0566 |      |  |
| <i>Athalia pyracea</i><br>(Ach.) Arup,<br>Frödén & Söchting | Aha.pyr | 7 |   | 6 | 3 | 7 | 5 | crust<br>ose | Lecan<br>ora | 2-<br>celle<br>d         | absent           | pycnidia | ascomata<br>without<br>carbonize<br>d               | spores not<br>pigmented | antraquin<br>oses                    | chlorococco<br>id and other<br>green | 0,19634937<br>5 | 1,92            | 245,5078  |      |  |

|                                                              |         |   |   |   |   |   |   |               |             |                          |         |          |                                       |                         |                                                  |                                      |                 |                 |          |  |  |  |
|--------------------------------------------------------------|---------|---|---|---|---|---|---|---------------|-------------|--------------------------|---------|----------|---------------------------------------|-------------------------|--------------------------------------------------|--------------------------------------|-----------------|-----------------|----------|--|--|--|
|                                                              |         |   |   |   |   |   |   |               |             |                          |         |          |                                       | structures              |                                                  |                                      |                 |                 |          |  |  |  |
| <i>Bacidia arceutina</i><br>(Ach.) Arnold                    | Bac.arc | 6 | 6 | 3 | 5 | 6 | 3 | crust<br>ose  | Lecid<br>ea | mult<br>i-<br>celle<br>d | absent  | pycnidia | ascomata<br>without<br>carbonize<br>d | spores not<br>pigmented | no<br>substance<br>s                             | chlorococco<br>id and other<br>green | 0,1256636       | 25,7142<br>8571 | 72,1793  |  |  |  |
|                                                              |         |   |   |   |   |   |   |               |             |                          |         |          |                                       | structures              |                                                  |                                      |                 |                 |          |  |  |  |
| <i>Bacidia<br/>laurocerasi</i> (Delise<br>ex Duby) Zahlbr.   | Bac.lau |   |   |   |   |   |   | crust<br>ose  | Lecid<br>ea | mult<br>i-<br>celle<br>d | absent  | pycnidia | ascomata<br>without<br>carbonize<br>d | spores not<br>pigmented | no<br>substance<br>s                             | chlorococco<br>id and other<br>green | 1,101065        | 16              | 287,6697 |  |  |  |
|                                                              |         |   |   |   |   |   |   |               |             |                          |         |          |                                       | structures              |                                                  |                                      |                 |                 |          |  |  |  |
| <i>Bacidia rubella</i><br>(Hoffm.) A.<br>Massal.             | Bac.rub | 6 | 6 | 3 | 5 | 7 | 5 | crust<br>ose  | Lecid<br>ea | mult<br>i-<br>celle<br>d | absent  | pycnidia | ascomata<br>without<br>carbonize<br>d | spores not<br>pigmented | no<br>substance<br>s                             | chlorococco<br>id and other<br>green | 0,56744969<br>4 | 20              | 217,8473 |  |  |  |
|                                                              |         |   |   |   |   |   |   |               |             |                          |         |          |                                       | structures              |                                                  |                                      |                 |                 |          |  |  |  |
| <i>Bactrospora<br/>dryina</i> (Ach.) A.<br>Massal.           | Bct.dry | 4 | 6 | 2 | 4 | 3 | 1 | crust<br>ose  | Lecid<br>ea | mult<br>i-<br>celle<br>d | absent  | pycnidia | ascomata<br>without<br>carbonize<br>d | spores not<br>pigmented | no<br>substance<br>s                             | <i>Trentepohli</i><br><i>a</i>       | 0,15904299<br>4 | 2,2             | 18,0039  |  |  |  |
|                                                              |         |   |   |   |   |   |   |               |             |                          |         |          |                                       | structures              |                                                  |                                      |                 |                 |          |  |  |  |
| <i>Biatora globulosa</i><br>(Flörke) Fr.                     | Bia.glo |   |   |   |   |   |   | crust<br>ose  | Lecid<br>ea | 2-<br>celle<br>d         | absent  | absent   | ascomata<br>without<br>carbonize<br>d | spores not<br>pigmented | no<br>substance<br>s                             | chlorococco<br>id and other<br>green | 0,09621119<br>4 | 3,61224<br>4898 | 31,0977  |  |  |  |
|                                                              |         |   |   |   |   |   |   |               |             |                          |         |          |                                       | structures              |                                                  |                                      |                 |                 |          |  |  |  |
| <i>Bryoria fuscescens</i><br>(Gyelnik) Brodo &<br>D. Hawksw. | Bry.fus | 7 | 4 | 6 | 6 | 3 | 4 | frutic<br>ose | absen<br>t  | absen<br>t               | soredia | absent   | absent                                | absent                  | benzyl<br>esters+β-<br>orcinol<br>depsidone<br>s | chlorococco<br>id and other<br>green |                 |                 |          |  |  |  |
|                                                              |         |   |   |   |   |   |   |               |             |                          |         |          |                                       | structures              |                                                  |                                      |                 |                 |          |  |  |  |
| <i>Buellia disciformis</i><br>(Fr.) Mudd                     | Bue.dis | 4 | 5 | 3 | 4 | 5 | 2 | crust<br>ose  | Lecid<br>ea | 2-<br>celle<br>d         | absent  | pycnidia | ascomata<br>with<br>carbonize<br>d    | spores<br>pigmented     | β-orcinol<br>depsides                            | chlorococco<br>id and other<br>green | 0,5026544       | 2,52941<br>1765 | 813,5802 |  |  |  |
|                                                              |         |   |   |   |   |   |   |               |             |                          |         |          |                                       | structures              |                                                  |                                      |                 |                 |          |  |  |  |
| <i>Buellia erubescens</i><br>Arnold                          | Bue.eru |   |   |   |   |   |   | crust<br>ose  | Lecid<br>ea | 2-<br>celle              | absent  | absent   | ascomata<br>with                      | spores<br>pigmented     | β-orcinol<br>depsidone                           | chlorococco<br>id and other          | 0,785           | 2,26666<br>67   | 500,478  |  |  |  |

|                                                                      |         |   |   |   |   |   |   |              |             |                  |         |          |                                                                                  |                     |                                                             |                                      |                 |                 |           |
|----------------------------------------------------------------------|---------|---|---|---|---|---|---|--------------|-------------|------------------|---------|----------|----------------------------------------------------------------------------------|---------------------|-------------------------------------------------------------|--------------------------------------|-----------------|-----------------|-----------|
|                                                                      |         |   |   |   |   |   |   | d            |             |                  |         |          | carbonize<br>d<br>structures                                                     |                     | s+β-<br>orcinol<br>depsides                                 | green                                |                 |                 |           |
| <i>Buellia<br/>griseovirens</i><br>(Turner & Borrer<br>ex Sm.) Almb. | Bue.gri | 4 | 5 | 5 | 4 | 5 | 4 | crust<br>ose | Lecid<br>ea | muri<br>form     | soredia | absent   | ascomata<br>with<br>carbonize<br>d<br>structures                                 | spores<br>pigmented | β-orcinol<br>depsidone<br>s+β-<br>orcinol<br>depsides       | chlorococco<br>id and other<br>green | 0,38465         | 2,15            | 1125,1756 |
| <i>Buellia schaeferi</i><br>De Not.                                  | Bue.sch |   |   |   |   |   |   | crust<br>ose | Lecid<br>ea | 2-<br>celle<br>d | absent  | pycnidia | ascomata<br>with<br>carbonize<br>d<br>structures                                 | spores<br>pigmented | no<br>substance<br>s                                        | chlorococco<br>id and other<br>green | 0,04908734<br>4 | 2,46153<br>8462 | 44,2569   |
| <i>Calicium<br/>adpersum</i> Pers.                                   | Cal.ads | 4 | 6 | 4 | 5 | 3 | 2 | crust<br>ose | stalke<br>d | 2-<br>celle<br>d | absent  | absent   | ascomata<br>with<br>carbonize<br>d<br>structures<br>+ascomat<br>a with<br>pruina | spores<br>pigmented | β-orcinol<br>depsidone<br>s+pulvinic<br>acid<br>derivatives | chlorococco<br>id and other<br>green | 0,15904299<br>4 | 2,41666<br>6667 | 273,3975  |
| <i>Calicium<br/>glaucellum</i> Ach.                                  | Cal.gla | 3 | 4 | 6 | 6 | 3 | 1 | crust<br>ose | stalke<br>d | 2-<br>celle<br>d | absent  | pycnidia | ascomata<br>with<br>carbonize<br>d<br>structures<br>+ascomat<br>a with<br>pruina | spores<br>pigmented | orcinol<br>depsidone<br>s+orcinol<br>depsides               | chlorococco<br>id and other<br>green | 0,06379391<br>2 | 1,91304<br>3478 | 190,4813  |
| <i>Calicium<br/>salicinum</i> Pers.                                  | Cal.sal | 3 | 4 | 6 | 5 | 4 | 2 | crust<br>ose | stalke<br>d | 2-<br>celle<br>d | absent  | absent   | ascomata<br>with<br>carbonize<br>d<br>structures<br>+ascomat<br>a with<br>pruina | spores<br>pigmented | β-orcinol<br>depsidone<br>s                                 | chlorococco<br>id and other<br>green | 0,06605192<br>9 | 2,11111<br>1111 | 100,7564  |
| <i>Calicium viride</i><br>Pers.                                      | Cal.vir | 3 | 4 | 6 | 7 | 2 | 2 | crust<br>ose | stalke<br>d | 2-<br>celle      | absent  | absent   | ascomata<br>with                                                                 | spores<br>pigmented | pulvinic<br>acid                                            | chlorococco<br>id and other          | 0,13854411<br>9 | 1,88461<br>5384 | 271,0734  |

|                                                                                 |         |   |   |   |   |   |   |              |              |                  |         |                                                              |                                                                                  |                         |                                     |                                      |            |                 |          |
|---------------------------------------------------------------------------------|---------|---|---|---|---|---|---|--------------|--------------|------------------|---------|--------------------------------------------------------------|----------------------------------------------------------------------------------|-------------------------|-------------------------------------|--------------------------------------|------------|-----------------|----------|
|                                                                                 |         |   |   |   |   |   |   |              | d            |                  |         | carbonize<br>d<br>structures<br>+ascomat<br>a with<br>pruina |                                                                                  | derivative<br>s         | green                               |                                      |            |                 |          |
| <i>Candelariella<br/>xanthostigma</i><br>(Ach.) Lettau                          | Can.xan | 7 | 5 | 5 | 3 | 5 | 5 | crust<br>ose | Lecan<br>ora | 1-<br>celle<br>d | soredia | absent                                                       | ascomata<br>without<br>carbonize<br>d<br>structures                              | spores not<br>pigmented | pulvinic<br>acid<br>derivative<br>s | chlorococco<br>id and other<br>green | 0,23758274 | 2,33333<br>3333 | 111,3623 |
| <i>Carbonicola<br/>anthracophila</i><br>(Nyl.) Bendiksby<br>& Timdal            | Crb.ant |   |   |   |   |   |   | crust<br>ose | absen<br>t   | abse<br>nt       | soredia | absent                                                       | absent                                                                           | absent                  | β-orcinol<br>depsidone<br>s         | chlorococco<br>id and other<br>green |            |                 |          |
| <i>Cetraria sepincola</i><br>(Ehrh.) Ach.                                       | Cta.sep | 8 | 3 | 7 | 5 | 3 | 1 | folio<br>se  | Lecan<br>ora | 1-<br>celle<br>d | absent  | pycnidia                                                     | ascomata<br>without<br>carbonize<br>d<br>structures                              | spores not<br>pigmented | aliphatic<br>acids                  | chlorococco<br>id and other<br>green | 4,90873437 | 1,82352<br>9412 | 73,3168  |
| <i>Cetrelia<br/>cetrarioides</i><br>(Delise) W.L.<br>Culb. & C.F. Culb.<br>s.l. | Cet.cet | 5 | 4 | 3 | 6 | 5 | 2 | folio<br>se  | absen<br>t   | abse<br>nt       | soredia | absent                                                       | absent                                                                           | absent                  | orcinol<br>depsides                 | chlorococco<br>id and other<br>green |            |                 |          |
| <i>Chaenotheca<br/>brachypoda</i> (Ach.)<br>Tibell                              | Cha.bra |   |   |   |   |   |   | crust<br>ose | stalke<br>d  | 1-<br>celle<br>d | absent  | absent                                                       | ascomata<br>with<br>carbonize<br>d<br>structures<br>+ascomat<br>a with<br>pruina | spores<br>pigmented     | pulvinic<br>acid<br>derivative<br>s | chlorococco<br>id and other<br>green | 0,01767144 | 1               | 22,4558  |
| <i>Chaenotheca<br/>brunneola</i> (Ach.)<br>Müll. Arg.                           | Cha.bru | 3 | 4 | 6 | 6 | 3 | 1 | crust<br>ose | stalke<br>d  | 1-<br>celle<br>d | absent  | absent                                                       | ascomata<br>with<br>carbonize<br>d<br>structures                                 | spores<br>pigmented     | β-orcinol<br>depsides               | chlorococco<br>id and other<br>green | 0,04908734 | 1               | 33,52    |

|                                                           |         |   |   |   |   |   |   |          |         |          |        |        |                                                           |                  |                           |                               |             |             |          |
|-----------------------------------------------------------|---------|---|---|---|---|---|---|----------|---------|----------|--------|--------|-----------------------------------------------------------|------------------|---------------------------|-------------------------------|-------------|-------------|----------|
| <i>Chaenotheca chlorella</i> (Ach.) Müll. Arg.            | Cha.chl |   |   |   |   |   |   | crustose | stalked | 1-celled | absent | absent | ascomata with carbonized structures +ascomata with pruina | spores pigmented | pulvinic acid derivatives | chlorococcoid and other green | 0,0314159   | 1,928571429 | 43,3076  |
| <i>Chaenotheca chrysocephala</i> (Ach.) Th. Fr.           | Cha.chr | 3 | 4 | 6 | 6 | 2 | 2 | crustose | stalked | 1-celled | absent | absent | ascomata with carbonized structures +ascomata with pruina | spores pigmented | pulvinic acid derivatives | chlorococcoid and other green | 0,055154539 | 1,666666667 | 79,5445  |
| <i>Chaenotheca ferruginea</i> (Turner) Mig.               | Cha.fer | 5 |   | 6 | 3 | 2 | 4 | crustose | stalked | 1-celled | absent | absent | ascomata with carbonized structures                       | spores pigmented | antraquinoses             | chlorococcoid and other green | 0,096211194 | 1           | 220,957  |
| <i>Chaenotheca furfuracea</i> (L.) Tibell                 | Cha.fur | 3 | 4 | 4 | 4 | 3 | 2 | leprose  | stalked | 1-celled | absent | absent | ascomata with carbonized structures +ascomata with pruina | spores pigmented | pulvinic acid derivatives | chlorococcoid and other green | 0,017671444 | 1           | 9,7468   |
| <i>Chaenotheca gracilentia</i> (Ach.) Mattsson & Middelb. | Cha.gra | 2 | 5 | 3 | 4 | 5 | 2 | leprose  | stalked | 1-celled | absent | absent | ascomata with carbonized structures +ascomata with pruina | spores pigmented | other substances          | chlorococcoid and other green | 0,017671444 | 1           | 10,8924  |
| <i>Chaenotheca phaeocephala</i>                           | Cha.pha | 5 | 5 | 5 | 4 | 3 | 3 | crustose | stalked | 1-celled | absent | absent | ascomata with                                             | spores pigmented | pulvinic acid             | chlorococcoid and other       | 0,061575164 | 1           | 143,8348 |

|                                                                                        |          |   |   |   |   |   |   |               |             |                  |         |          |                                                                                  |                     |                                                                                |                                      |                 |   |         |
|----------------------------------------------------------------------------------------|----------|---|---|---|---|---|---|---------------|-------------|------------------|---------|----------|----------------------------------------------------------------------------------|---------------------|--------------------------------------------------------------------------------|--------------------------------------|-----------------|---|---------|
| (Turner) Th. Fr.                                                                       |          |   |   |   |   |   |   |               | d           |                  |         |          | carbonize<br>d<br>structures<br>+ascomat<br>a with<br>pruina                     |                     | derivative<br>s                                                                | green                                |                 |   |         |
| <i>Chaenotheca<br/>trichialis</i> (Ach.)<br>Th. Fr.                                    | Cha.tri  | 3 | 5 | 5 | 4 | 4 | 2 | crust<br>ose  | stalke<br>d | 1-<br>celle<br>d | absent  | absent   | ascomata<br>with<br>carbonize<br>d<br>structures<br>+ascomat<br>a with<br>pruina | spores<br>pigmented | other<br>substance<br>s                                                        | chlorococco<br>id and other<br>green | 0,04908734<br>4 | 1 | 22,4558 |
| <i>Chaenotheca<br/>xyloxena</i> Nádv.                                                  | Cha.xyl  |   |   |   |   |   |   | crust<br>ose  | stalke<br>d | 1-<br>celle<br>d | absent  | absent   | ascomata<br>with<br>carbonize<br>d<br>structures<br>+ascomat<br>a with<br>pruina | spores<br>pigmented | no<br>substance<br>s                                                           | chlorococco<br>id and other<br>green | 0,04908734<br>4 | 1 | 22,4558 |
| <i>Chrysothrix<br/>candelaris</i> (L.) J.<br>R. Laundon                                | Chr.can  | 4 | 5 | 4 | 4 | 3 | 2 | lepro<br>se   | absen<br>t  | abse<br>nt       | soredia | absent   | absent                                                                           | absent              | pulvinic<br>acid<br>derivative<br>s                                            | chlorococco<br>id and other<br>green |                 |   |         |
| <i>Cladonia<br/>arbuscula</i> (Wallr.)<br>Flot. subsp.<br><i>beringiana</i> Ahti       | Cla.a.be | 8 |   | 6 |   |   | 1 | frutic<br>ose | absen<br>t  | abse<br>nt       | absent  | pycnidia | absent                                                                           | absent              | β-orcinol<br>depsidone<br>s+usnic<br>acid<br>derivative<br>s                   | chlorococco<br>id and other<br>green |                 |   |         |
| <i>Cladonia<br/>arbuscula</i> (Wallr.)<br>Flot. subsp. <i>mitis</i><br>(Sandst.) Ruoss | Cla.a.mi | 9 |   | 7 |   |   | 1 | frutic<br>ose | absen<br>t  | abse<br>nt       | absent  | pycnidia | absent                                                                           | absent              | aliphatic<br>acids+β-<br>orcinol<br>depsidone<br>s+usnic<br>acid<br>derivative | chlorococco<br>id and other<br>green |                 |   |         |

|                                                                  |         |   |   |   |   |   |   |           |         |          |         |          |                                        |                      |                                                  |                               |             |             |          |
|------------------------------------------------------------------|---------|---|---|---|---|---|---|-----------|---------|----------|---------|----------|----------------------------------------|----------------------|--------------------------------------------------|-------------------------------|-------------|-------------|----------|
| <i>Cladonia botrytes</i><br>(K. G. Hagen)<br>Willd.              | Cla.bot |   |   |   |   |   |   | fruticose | Lecidea | 1-celled | absent  | pycnidia | ascomata without carbonized structures | spores not pigmented | $\beta$ -orcinol depsides+ usnic acid derivative | chlorococcoid and other green | 0,7853975   | 3,8181818   | 41,589   |
| <i>Cladonia caespiticia</i> (Pers.)<br>Flörke                    | Cla.cae | 6 | 5 | 3 | 5 | 2 |   | fruticose | Lecidea | 1-celled | absent  | pycnidia | ascomata without carbonized structures | spores not pigmented | $\beta$ -orcinol depsidones                      | chlorococcoid and other green | 1,038688193 | 3,428571429 | 76,9913  |
| <i>Cladonia cenotea</i> (Ach.) Schaer.                           | Cla.cen | 6 | 4 | 6 | 6 | 2 | 1 | fruticose | absent  | absent   | soredia | absent   | absent                                 | absent               | $\beta$ -orcinol depsides                        | chlorococcoid and other green |             |             |          |
| <i>Cladonia chlorophaea</i> (Flörke ex Sommerf.) Spreng.<br>s.l. | Cla.chl |   |   |   |   |   |   | fruticose | absent  | absent   | soredia | pycnidia | absent                                 | absent               | $\beta$ -orcinol depsidones                      | chlorococcoid and other green |             |             |          |
| <i>Cladonia coniocraea</i> (Flörke) Spreng.                      | Cla.con | 5 |   | 6 | 4 | 3 |   | fruticose | Lecidea | 1-celled | soredia | pycnidia | ascomata without carbonized structures | spores not pigmented | $\beta$ -orcinol depsidones                      | chlorococcoid and other green | 0,785       | 2,888888889 | 137,7686 |
| <i>Cladonia cornuta</i> (L.) Hoffm.                              | Cla.cor |   |   |   |   |   |   | fruticose | absent  | absent   | soredia | absent   | absent                                 | absent               | $\beta$ -orcinol depsidones                      | chlorococcoid and other green |             |             |          |
| <i>Cladonia crispata</i> (Ach.) Flot.                            | Cla.cri |   |   |   |   |   |   | fruticose | absent  | absent   | absent  | absent   | absent                                 | absent               | $\beta$ -orcinol depsides                        | chlorococcoid and other green |             |             |          |
| <i>Cladonia deformis</i> (L.) Hoffm.                             | Cla.def | 7 | 4 | 6 | 5 | 2 | 1 | fruticose | absent  | absent   | soredia | pycnidia | absent                                 | absent               | usnic acid derivative + terpenoids               | chlorococcoid and other green |             |             |          |
| <i>Cladonia digitata</i> (L.) Hoffm.                             | Cla.dig | 5 | 4 | 6 |   | 2 | 3 | fruticose | Lecidea | 1-celled | soredia | pycnidia | ascomata without carbonized structures | spores not pigmented | $\beta$ -orcinol depsides+ naphthaquinones       | chlorococcoid and other green | 0,7862975   | 3,428571429 | 76,9913  |

|  |  |  |  |  |  |  |  |  |  |  |  |  |  |  |            |  |  |  |  |  |  |  |  |  |  |  |  |  |  |  |  |  |  |  |  |  |  |  |  |  |  |  |  |  |  |  |  |  |  |  |  |  |  |  |  |  |  |  |  |  |  |  |  |  |  |  |  |  |  |  |  |  |  |  |  |  |  |  |  |  |  |  |  |  |  |  |  |  |  |  |  |  |  |  |  |  |  |  |  |  |  |  |  |  |  |  |  |  |  |  |  |  |  |  |  |  |  |  |  |  |  |  |  |  |  |  |  |  |  |  |  |  |  |  |  |  |  |  |  |  |  |  |  |  |  |  |  |  |  |  |  |  |  |  |  |  |  |  |  |  |  |  |  |  |  |  |  |  |  |  |  |  |  |  |  |  |  |  |  |  |  |  |  |  |  |  |  |  |  |  |  |  |  |  |  |  |  |  |  |  |  |  |  |  |  |  |  |  |  |  |  |  |  |  |  |  |  |  |  |  |  |  |  |  |  |  |  |  |  |  |  |  |  |  |  |  |  |  |  |  |  |  |  |  |  |  |  |  |  |  |  |  |  |  |  |  |  |  |  |  |  |  |  |  |  |  |  |  |  |  |  |  |  |  |  |  |  |  |  |  |  |  |  |  |  |  |  |  |  |  |  |  |  |  |  |  |  |  |  |  |  |  |  |  |  |  |  |  |  |  |  |  |  |  |  |  |  |  |  |  |  |  |  |  |  |  |  |  |  |  |  |  |  |  |  |  |  |  |  |  |  |  |  |  |  |  |  |  |  |  |  |  |  |  |  |  |  |  |  |  |  |  |  |  |  |  |  |  |  |  |  |  |  |  |  |  |  |  |  |  |  |  |  |  |  |  |  |  |  |  |  |  |  |  |  |  |  |  |  |  |  |  |  |  |  |  |  |  |  |  |  |  |  |  |  |  |  |  |  |  |  |  |  |  |  |  |  |  |  |  |  |  |  |  |  |  |  |  |  |  |  |  |  |  |  |  |  |  |  |  |  |  |  |  |  |  |  |  |  |  |  |  |  |  |  |  |  |  |  |  |  |  |  |  |  |  |  |  |  |  |  |  |  |  |  |  |  |  |  |  |  |  |  |  |  |  |  |  |  |  |  |  |  |  |  |  |  |  |  |  |  |  |  |  |  |  |  |  |  |  |  |  |  |  |  |  |  |  |  |  |  |  |  |  |  |  |  |  |  |  |  |  |  |  |  |  |  |  |  |  |  |  |  |  |  |  |  |  |  |  |  |  |  |  |  |  |  |  |  |  |  |  |  |  |  |  |  |  |  |  |  |  |  |  |  |  |  |  |  |  |  |  |  |  |  |  |  |  |  |  |  |  |  |  |  |  |  |  |  |  |  |  |  |  |  |  |  |  |  |  |  |  |  |  |  |  |  |  |  |  |  |  |  |  |  |  |  |  |  |  |  |  |  |  |  |  |  |  |  |  |  |  |  |  |  |  |  |  |  |  |  |  |  |  |  |  |  |  |  |  |  |  |  |  |  |  |  |  |  |  |  |  |  |  |  |  |  |  |  |  |  |  |  |  |  |  |  |  |  |  |  |  |  |  |  |  |  |  |  |  |  |  |  |  |  |  |  |  |  |  |  |  |  |  |  |  |  |  |  |  |  |  |  |  |  |  |  |  |  |  |  |  |  |  |  |  |  |  |  |  |  |  |  |  |  |  |  |  |  |  |  |  |  |  |  |  |  |  |  |  |  |  |  |  |  |  |  |  |  |  |  |  |  |  |  |  |  |  |  |  |  |  |  |  |  |  |  |  |  |  |  |  |  |  |  |  |  |  |  |  |  |  |  |  |  |  |  |  |  |  |  |  |  |  |  |  |  |  |  |  |  |  |  |  |  |  |  |  |  |  |  |  |  |  |  |  |  |  |  |  |  |  |  |  |  |  |  |  |  |  |  |  |  |  |  |  |  |  |  |  |  |  |  |  |  |  |  |  |  |  |  |  |  |  |  |  |  |  |  |  |  |  |  |  |  |  |  |  |  |  |  |  |  |  |  |  |  |  |  |  |  |  |  |  |  |  |  |  |  |  |  |  |  |  |  |  |  |  |  |  |  |  |  |  |  |  |  |  |  |  |  |  |  |  |  |  |  |  |  |  |  |  |  |  |  |  |  |  |  |  |  |  |  |  |  |  |  |  |  |  |  |  |  |  |  |  |  |  |  |  |  |  |  |  |  |  |  |  |  |  |  |  |  |  |  |  |  |  |  |  |  |  |  |  |  |  |  |  |  |  |  |  |  |  |  |  |  |  |  |  |  |  |  |  |  |  |  |  |  |  |  |  |  |  |  |  |  |  |  |  |  |  |  |  |  |  |  |  |  |  |  |  |  |  |  |  |  |  |  |  |  |  |  |  |  |  |  |  |  |  |  |  |  |  |  |  |  |  |  |  |  |  |  |  |  |  |  |  |  |  |  |  |  |  |  |  |  |  |  |  |  |  |  |  |  |  |  |  |  |  |  |  |  |  |  |  |  |  |  |  |  |  |  |  |  |  |  |  |  |  |  |  |  |  |  |  |  |  |  |  |  |  |  |  |  |  |  |  |  |  |  |  |  |  |  |  |  |  |  |  |  |  |  |  |  |  |  |  |  |  |  |  |  |  |  |  |  |  |  |  |  |  |  |  |  |  |  |  |  |  |  |  |  |  |  |  |  |  |  |  |  |  |  |  |  |  |  |  |
|--|--|--|--|--|--|--|--|--|--|--|--|--|--|--|------------|--|--|--|--|--|--|--|--|--|--|--|--|--|--|--|--|--|--|--|--|--|--|--|--|--|--|--|--|--|--|--|--|--|--|--|--|--|--|--|--|--|--|--|--|--|--|--|--|--|--|--|--|--|--|--|--|--|--|--|--|--|--|--|--|--|--|--|--|--|--|--|--|--|--|--|--|--|--|--|--|--|--|--|--|--|--|--|--|--|--|--|--|--|--|--|--|--|--|--|--|--|--|--|--|--|--|--|--|--|--|--|--|--|--|--|--|--|--|--|--|--|--|--|--|--|--|--|--|--|--|--|--|--|--|--|--|--|--|--|--|--|--|--|--|--|--|--|--|--|--|--|--|--|--|--|--|--|--|--|--|--|--|--|--|--|--|--|--|--|--|--|--|--|--|--|--|--|--|--|--|--|--|--|--|--|--|--|--|--|--|--|--|--|--|--|--|--|--|--|--|--|--|--|--|--|--|--|--|--|--|--|--|--|--|--|--|--|--|--|--|--|--|--|--|--|--|--|--|--|--|--|--|--|--|--|--|--|--|--|--|--|--|--|--|--|--|--|--|--|--|--|--|--|--|--|--|--|--|--|--|--|--|--|--|--|--|--|--|--|--|--|--|--|--|--|--|--|--|--|--|--|--|--|--|--|--|--|--|--|--|--|--|--|--|--|--|--|--|--|--|--|--|--|--|--|--|--|--|--|--|--|--|--|--|--|--|--|--|--|--|--|--|--|--|--|--|--|--|--|--|--|--|--|--|--|--|--|--|--|--|--|--|--|--|--|--|--|--|--|--|--|--|--|--|--|--|--|--|--|--|--|--|--|--|--|--|--|--|--|--|--|--|--|--|--|--|--|--|--|--|--|--|--|--|--|--|--|--|--|--|--|--|--|--|--|--|--|--|--|--|--|--|--|--|--|--|--|--|--|--|--|--|--|--|--|--|--|--|--|--|--|--|--|--|--|--|--|--|--|--|--|--|--|--|--|--|--|--|--|--|--|--|--|--|--|--|--|--|--|--|--|--|--|--|--|--|--|--|--|--|--|--|--|--|--|--|--|--|--|--|--|--|--|--|--|--|--|--|--|--|--|--|--|--|--|--|--|--|--|--|--|--|--|--|--|--|--|--|--|--|--|--|--|--|--|--|--|--|--|--|--|--|--|--|--|--|--|--|--|--|--|--|--|--|--|--|--|--|--|--|--|--|--|--|--|--|--|--|--|--|--|--|--|--|--|--|--|--|--|--|--|--|--|--|--|--|--|--|--|--|--|--|--|--|--|--|--|--|--|--|--|--|--|--|--|--|--|--|--|--|--|--|--|--|--|--|--|--|--|--|--|--|--|--|--|--|--|--|--|--|--|--|--|--|--|--|--|--|--|--|--|--|--|--|--|--|--|--|--|--|--|--|--|--|--|--|--|--|--|--|--|--|--|--|--|--|--|--|--|--|--|--|--|--|--|--|--|--|--|--|--|--|--|--|--|--|--|--|--|--|--|--|--|--|--|--|--|--|--|--|--|--|--|--|--|--|--|--|--|--|--|--|--|--|--|--|--|--|--|--|--|--|--|--|--|--|--|--|--|--|--|--|--|--|--|--|--|--|--|--|--|--|--|--|--|--|--|--|--|--|--|--|--|--|--|--|--|--|--|--|--|--|--|--|--|--|--|--|--|--|--|--|--|--|--|--|--|--|--|--|--|--|--|--|--|--|--|--|--|--|--|--|--|--|--|--|--|--|--|--|--|--|--|--|--|--|--|--|--|--|--|--|--|--|--|--|--|--|--|--|--|--|--|--|--|--|--|--|--|--|--|--|--|--|--|--|--|--|--|--|--|--|--|--|--|--|--|--|--|--|--|--|--|--|--|--|--|--|--|--|--|--|--|--|--|--|--|--|--|--|--|--|--|--|--|--|--|--|--|--|--|--|--|--|--|--|--|--|--|--|--|--|--|--|--|--|--|--|--|--|--|--|--|--|--|--|--|--|--|--|--|--|--|--|--|--|--|--|--|--|--|--|--|--|--|--|--|--|--|--|--|--|--|--|--|--|--|--|--|--|--|--|--|--|--|--|--|--|--|--|--|--|--|--|--|--|--|--|--|--|--|--|--|--|--|--|--|--|--|--|--|--|--|--|--|--|--|--|--|--|--|--|--|--|--|--|--|--|--|--|--|--|--|--|--|--|--|--|--|--|--|--|--|--|--|--|--|--|--|--|--|--|--|--|--|--|--|--|--|--|--|--|--|--|--|--|--|--|--|--|--|--|--|--|--|--|--|--|--|--|--|--|--|--|--|--|--|--|--|--|--|--|--|--|--|--|--|--|--|--|--|--|--|--|--|--|--|--|--|--|--|--|--|--|--|--|--|--|--|--|--|--|--|--|--|--|--|--|--|--|--|--|--|--|--|--|--|--|--|--|--|--|--|--|--|--|--|--|--|--|--|--|--|--|--|--|--|--|--|--|--|--|--|--|--|--|--|--|--|--|--|--|--|--|--|--|--|--|--|--|--|--|--|--|--|--|--|--|--|--|--|--|--|--|--|--|--|--|--|--|--|--|--|--|--|--|--|--|--|--|--|--|--|--|--|--|--|--|--|--|--|--|--|--|--|--|--|--|--|--|--|--|--|--|--|--|--|--|--|--|--|--|--|--|--|--|--|--|--|--|--|--|--|--|--|--|--|--|--|--|--|--|--|
|  |  |  |  |  |  |  |  |  |  |  |  |  |  |  | structures |  |  |  |  |  |  |  |  |  |  |  |  |  |  |  |  |  |  |  |  |  |  |  |  |  |  |  |  |  |  |  |  |  |  |  |  |  |  |  |  |  |  |  |  |  |  |  |  |  |  |  |  |  |  |  |  |  |  |  |  |  |  |  |  |  |  |  |  |  |  |  |  |  |  |  |  |  |  |  |  |  |  |  |  |  |  |  |  |  |  |  |  |  |  |  |  |  |  |  |  |  |  |  |  |  |  |  |  |  |  |  |  |  |  |  |  |  |  |  |  |  |  |  |  |  |  |  |  |  |  |  |  |  |  |  |  |  |  |  |  |  |  |  |  |  |  |  |  |  |  |  |  |  |  |  |  |  |  |  |  |  |  |  |  |  |  |  |  |  |  |  |  |  |  |  |  |  |  |  |  |  |  |  |  |  |  |  |  |  |  |  |  |  |  |  |  |  |  |  |  |  |  |  |  |  |  |  |  |  |  |  |  |  |  |  |  |  |  |  |  |  |  |  |  |  |  |  |  |  |  |  |  |  |  |  |  |  |  |  |  |  |  |  |  |  |  |  |  |  |  |  |  |  |  |  |  |  |  |  |  |  |  |  |  |  |  |  |  |  |  |  |  |  |  |  |  |  |  |  |  |  |  |  |  |  |  |  |  |  |  |  |  |  |  |  |  |  |  |  |  |  |  |  |  |  |  |  |  |  |  |  |  |  |  |  |  |  |  |  |  |  |  |  |  |  |  |  |  |  |  |  |  |  |  |  |  |  |  |  |  |  |  |  |  |  |  |  |  |  |  |  |  |  |  |  |  |  |  |  |  |  |  |  |  |  |  |  |  |  |  |  |  |  |  |  |  |  |  |  |  |  |  |  |  |  |  |  |  |  |  |  |  |  |  |  |  |  |  |  |  |  |  |  |  |  |  |  |  |  |  |  |  |  |  |  |  |  |  |  |  |  |  |  |  |  |  |  |  |  |  |  |  |  |  |  |  |  |  |  |  |  |  |  |  |  |  |  |  |  |  |  |  |  |  |  |  |  |  |  |  |  |  |  |  |  |  |  |  |  |  |  |  |  |  |  |  |  |  |  |  |  |  |  |  |  |  |  |  |  |  |  |  |  |  |  |  |  |  |  |  |  |  |  |  |  |  |  |  |  |  |  |  |  |  |  |  |  |  |  |  |  |  |  |  |  |  |  |  |  |  |  |  |  |  |  |  |  |  |  |  |  |  |  |  |  |  |  |  |  |  |  |  |  |  |  |  |  |  |  |  |  |  |  |  |  |  |  |  |  |  |  |  |  |  |  |  |  |  |  |  |  |  |  |  |  |  |  |  |  |  |  |  |  |  |  |  |  |  |  |  |  |  |  |  |  |  |  |  |  |  |  |  |  |  |  |  |  |  |  |  |  |  |  |  |  |  |  |  |  |  |  |  |  |  |  |  |  |  |  |  |  |  |  |  |  |  |  |  |  |  |  |  |  |  |  |  |  |  |  |  |  |  |  |  |  |  |  |  |  |  |  |  |  |  |  |  |  |  |  |  |  |  |  |  |  |  |  |  |  |  |  |  |  |  |  |  |  |  |  |  |  |  |  |  |  |  |  |  |  |  |  |  |  |  |  |  |  |  |  |  |  |  |  |  |  |  |  |  |  |  |  |  |  |  |  |  |  |  |  |  |  |  |  |  |  |  |  |  |  |  |  |  |  |  |  |  |  |  |  |  |  |  |  |  |  |  |  |  |  |  |  |  |  |  |  |  |  |  |  |  |  |  |  |  |  |  |  |  |  |  |  |  |  |  |  |  |  |  |  |  |  |  |  |  |  |  |  |  |  |  |  |  |  |  |  |  |  |  |  |  |  |  |  |  |  |  |  |  |  |  |  |  |  |  |  |  |  |  |  |  |  |  |  |  |  |  |  |  |  |  |  |  |  |  |  |  |  |  |  |  |  |  |  |  |  |  |  |  |  |  |  |  |  |  |  |  |  |  |  |  |  |  |  |  |  |  |  |  |  |  |  |  |  |  |  |  |  |  |  |  |  |  |  |  |  |  |  |  |  |  |  |  |  |  |  |  |  |  |  |  |  |  |  |  |  |  |  |  |  |  |  |  |  |  |  |  |  |  |  |  |  |  |  |  |  |  |  |  |  |  |  |  |  |  |  |  |  |  |  |  |  |  |  |  |  |  |  |  |  |  |  |  |  |  |  |  |  |  |  |  |  |  |  |  |  |  |  |  |  |  |  |  |  |  |  |  |  |  |  |  |  |  |  |  |  |  |  |  |  |  |  |  |  |  |  |  |  |  |  |  |  |  |  |  |  |  |  |  |  |  |  |  |  |  |  |  |  |  |  |  |  |  |  |  |  |  |  |  |  |  |  |  |  |  |  |  |  |  |  |  |  |  |  |  |  |  |  |  |  |  |  |  |  |  |  |  |  |  |  |  |  |  |  |  |  |  |  |  |  |  |  |  |  |  |  |  |  |  |  |  |  |  |  |  |  |  |  |  |  |  |  |  |  |  |  |  |  |  |  |  |  |  |  |  |  |  |  |  |  |  |  |  |  |  |  |  |  |  |  |  |  |  |  |  |  |  |  |  |  |  |  |  |  |  |  |  |  |  |  |  |  |  |  |  |  |  |  |  |  |  |  |  |  |  |  |  |  |  |  |  |  |  |  |  |  |  |  |  |  |  |  |  |  |
|--|--|--|--|--|--|--|--|--|--|--|--|--|--|--|------------|--|--|--|--|--|--|--|--|--|--|--|--|--|--|--|--|--|--|--|--|--|--|--|--|--|--|--|--|--|--|--|--|--|--|--|--|--|--|--|--|--|--|--|--|--|--|--|--|--|--|--|--|--|--|--|--|--|--|--|--|--|--|--|--|--|--|--|--|--|--|--|--|--|--|--|--|--|--|--|--|--|--|--|--|--|--|--|--|--|--|--|--|--|--|--|--|--|--|--|--|--|--|--|--|--|--|--|--|--|--|--|--|--|--|--|--|--|--|--|--|--|--|--|--|--|--|--|--|--|--|--|--|--|--|--|--|--|--|--|--|--|--|--|--|--|--|--|--|--|--|--|--|--|--|--|--|--|--|--|--|--|--|--|--|--|--|--|--|--|--|--|--|--|--|--|--|--|--|--|--|--|--|--|--|--|--|--|--|--|--|--|--|--|--|--|--|--|--|--|--|--|--|--|--|--|--|--|--|--|--|--|--|--|--|--|--|--|--|--|--|--|--|--|--|--|--|--|--|--|--|--|--|--|--|--|--|--|--|--|--|--|--|--|--|--|--|--|--|--|--|--|--|--|--|--|--|--|--|--|--|--|--|--|--|--|--|--|--|--|--|--|--|--|--|--|--|--|--|--|--|--|--|--|--|--|--|--|--|--|--|--|--|--|--|--|--|--|--|--|--|--|--|--|--|--|--|--|--|--|--|--|--|--|--|--|--|--|--|--|--|--|--|--|--|--|--|--|--|--|--|--|--|--|--|--|--|--|--|--|--|--|--|--|--|--|--|--|--|--|--|--|--|--|--|--|--|--|--|--|--|--|--|--|--|--|--|--|--|--|--|--|--|--|--|--|--|--|--|--|--|--|--|--|--|--|--|--|--|--|--|--|--|--|--|--|--|--|--|--|--|--|--|--|--|--|--|--|--|--|--|--|--|--|--|--|--|--|--|--|--|--|--|--|--|--|--|--|--|--|--|--|--|--|--|--|--|--|--|--|--|--|--|--|--|--|--|--|--|--|--|--|--|--|--|--|--|--|--|--|--|--|--|--|--|--|--|--|--|--|--|--|--|--|--|--|--|--|--|--|--|--|--|--|--|--|--|--|--|--|--|--|--|--|--|--|--|--|--|--|--|--|--|--|--|--|--|--|--|--|--|--|--|--|--|--|--|--|--|--|--|--|--|--|--|--|--|--|--|--|--|--|--|--|--|--|--|--|--|--|--|--|--|--|--|--|--|--|--|--|--|--|--|--|--|--|--|--|--|--|--|--|--|--|--|--|--|--|--|--|--|--|--|--|--|--|--|--|--|--|--|--|--|--|--|--|--|--|--|--|--|--|--|--|--|--|--|--|--|--|--|--|--|--|--|--|--|--|--|--|--|--|--|--|--|--|--|--|--|--|--|--|--|--|--|--|--|--|--|--|--|--|--|--|--|--|--|--|--|--|--|--|--|--|--|--|--|--|--|--|--|--|--|--|--|--|--|--|--|--|--|--|--|--|--|--|--|--|--|--|--|--|--|--|--|--|--|--|--|--|--|--|--|--|--|--|--|--|--|--|--|--|--|--|--|--|--|--|--|--|--|--|--|--|--|--|--|--|--|--|--|--|--|--|--|--|--|--|--|--|--|--|--|--|--|--|--|--|--|--|--|--|--|--|--|--|--|--|--|--|--|--|--|--|--|--|--|--|--|--|--|--|--|--|--|--|--|--|--|--|--|--|--|--|--|--|--|--|--|--|--|--|--|--|--|--|--|--|--|--|--|--|--|--|--|--|--|--|--|--|--|--|--|--|--|--|--|--|--|--|--|--|--|--|--|--|--|--|--|--|--|--|--|--|--|--|--|--|--|--|--|--|--|--|--|--|--|--|--|--|--|--|--|--|--|--|--|--|--|--|--|--|--|--|--|--|--|--|--|--|--|--|--|--|--|--|--|--|--|--|--|--|--|--|--|--|--|--|--|--|--|--|--|--|--|--|--|--|--|--|--|--|--|--|--|--|--|--|--|--|--|--|--|--|--|--|--|--|--|--|--|--|--|--|--|--|--|--|--|--|--|--|--|--|--|--|--|--|--|--|--|--|--|--|--|--|--|--|--|--|--|--|--|--|--|--|--|--|--|--|--|--|--|--|--|--|--|--|--|--|--|--|--|--|--|--|--|--|--|--|--|--|--|--|--|--|--|--|--|--|--|--|--|--|--|--|--|--|--|--|--|--|--|--|--|--|--|--|--|--|--|--|--|--|--|--|--|--|--|--|--|--|--|--|--|--|--|--|--|--|--|--|--|--|--|--|--|--|--|--|--|--|--|--|--|--|--|--|--|--|--|--|--|--|--|--|--|--|--|--|--|--|--|--|--|--|--|--|--|--|--|--|--|--|--|--|--|--|--|--|--|--|--|--|--|--|--|--|--|--|--|--|--|--|--|--|--|--|--|--|--|--|--|--|--|--|--|--|--|--|--|--|--|--|--|--|--|--|--|--|--|--|--|--|--|--|--|--|--|--|--|--|--|--|--|--|--|--|--|--|--|--|--|--|--|--|--|--|--|--|--|--|--|--|--|--|--|--|--|--|--|--|--|--|--|--|--|--|--|--|--|--|--|--|--|--|--|--|--|--|--|--|--|--|--|--|--|--|--|--|--|--|--|--|--|--|--|--|--|--|--|--|--|--|--|--|--|--|--|--|--|--|--|--|

|                                                                                      |         |   |   |   |   |   |               |               |                          |                              |          |                                                                                  |                         |                                                       |                                      |                                      |                 |          |
|--------------------------------------------------------------------------------------|---------|---|---|---|---|---|---------------|---------------|--------------------------|------------------------------|----------|----------------------------------------------------------------------------------|-------------------------|-------------------------------------------------------|--------------------------------------|--------------------------------------|-----------------|----------|
| (Hoffm.) Hoffm.                                                                      |         |   |   |   |   |   |               | d             |                          | carbonize<br>d<br>structures |          |                                                                                  | green                   |                                                       |                                      |                                      |                 |          |
| <i>Cladonia<br/>phyllophora</i><br>Hoffm.                                            | Cla.phy |   |   |   |   |   |               | frutic<br>ose | absen<br>t               | abse<br>nt                   | absent   | pycnidia                                                                         | absent                  | absent                                                | β-orcinol<br>depsidone<br>s          | chlorococco<br>id and other<br>green |                 |          |
| <i>Cladonia<br/>rangiferina</i> (L.) F.<br>H. Wigg.                                  | Cla.ran | 6 | 4 | 6 | 5 | 1 | frutic<br>ose | absen<br>t    | abse<br>nt               | absent                       | pycnidia | absent                                                                           | absent                  | β-orcinol<br>depsidone<br>s+β-<br>orcinol<br>depsides | chlorococco<br>id and other<br>green |                                      |                 |          |
| <i>Cladonia<br/>squamosa</i> Hoffm.                                                  | Cla.squ | 6 | 4 | 6 | 5 | 2 | frutic<br>ose | absen<br>t    | abse<br>nt               | absent                       | pycnidia | absent                                                                           | absent                  | β-orcinol<br>depsides                                 | chlorococco<br>id and other<br>green |                                      |                 |          |
| <i>Cladonia subulata</i><br>(L.) F. H. Wigg.                                         | Cla.sub | 8 |   | 6 |   | 3 | frutic<br>ose | absen<br>t    | abse<br>nt               | soredia                      | absent   | absent                                                                           | absent                  | β-orcinol<br>depsidone<br>s                           | chlorococco<br>id and other<br>green |                                      |                 |          |
| <i>Coenogonium<br/>pineti</i> (Schr. ex<br>Ach.) Lücking &<br>Lumbsch                | Coe.pin | 3 | 5 | 3 | 4 | 4 | crust<br>ose  | Lecid<br>ea   | 2-<br>celle<br>d         | absent                       | pycnidia | ascomata<br>without<br>carbonize<br>d<br>structures                              | spores not<br>pigmented | no<br>substance<br>s                                  | <i>Trentepohli</i><br><i>a</i>       | 0,09621119                           | 3,65079<br>4    | 59,7645  |
| <i>Coniocarpon<br/>cinnabarinum</i> DC.                                              | Con.cin | 4 | 7 | 2 | 5 | 6 | crust<br>ose  | artho<br>nia  | mult<br>i-<br>celle<br>d | absent                       | pycnidia | ascomata<br>with<br>carbonize<br>d<br>structures<br>+ascomat<br>a with<br>pruina | spores not<br>pigmented | antraquin<br>oses                                     | <i>Trentepohli</i><br><i>a</i>       | 0,17867793                           | 2,90909<br>0909 | 855,5456 |
| <i>Diarthonis<br/>spadicea</i> (Leight.)<br>Frisch, Ertz,<br>Coppins &<br>P.F.Cannon | Dia.spa | 2 | 6 | 3 | 4 | 4 | crust<br>ose  | artho<br>nia  | 2-<br>celle<br>d         | absent                       | pycnidia | ascomata<br>without<br>carbonize<br>d<br>structures                              | spores not<br>pigmented | no<br>substance<br>s                                  | <i>Trentepohli</i><br><i>a</i>       | 0,56744969                           | 2,57142<br>8571 | 57,7434  |
| <i>Evernia divaricata</i><br>(L.) Ach.                                               | Eve.div | 7 | 4 | 6 | 6 | 3 | frutic<br>ose | absen<br>t    | abse<br>nt               | soredia                      | absent   | absent                                                                           | absent                  | orcinol<br>depsides+<br>usnic acid                    | chlorococco<br>id and other<br>green |                                      |                 |          |

|                                                                                 |         |   |   |   |   |   |   |           |               |                          |         |          |                                                                                  |                         |                            |                                                                                                                         |                                      |                 |           |
|---------------------------------------------------------------------------------|---------|---|---|---|---|---|---|-----------|---------------|--------------------------|---------|----------|----------------------------------------------------------------------------------|-------------------------|----------------------------|-------------------------------------------------------------------------------------------------------------------------|--------------------------------------|-----------------|-----------|
|                                                                                 |         |   |   |   |   |   |   |           |               |                          |         |          |                                                                                  |                         |                            | derivative<br>s                                                                                                         |                                      |                 |           |
| <i>Evernia prunastri</i><br>(L.) Ach.                                           | Eve.pru | 7 | 5 | 6 | 4 | 3 | 4 | fruticose | absent        | absent                   | soredia | absent   | absent                                                                           | absent                  |                            | orcinol<br>depsides+<br>β-orcinol<br>chlorococco<br>depsides+ id<br>usnic acid<br>and other<br>green<br>derivative<br>s |                                      |                 |           |
| <i>Felipes leucopellaeus</i><br>(Ach.) Frisch & G.Thor                          | Fel.leu | 2 | 4 | 2 | 7 | 3 | 1 | crustose  | artho-<br>nia | mult<br>i-<br>celle<br>d | absent  | absent   | ascomata<br>with<br>carbonize<br>d<br>structures<br>+ascomat<br>a with<br>pruina | spores not<br>pigmented | other<br>substance<br>s    | <i>Trentepohli</i><br><i>a</i>                                                                                          | 1,76714437<br>5                      | 2,94117<br>6471 | 118,2529  |
| <i>Fellhanera gyrophorica</i><br>Sérus., Coppins,<br>Diederich &<br>Scheidegger | Flh.gyr |   |   |   |   |   |   | crustose  | Lecid<br>ea   | mult<br>i-<br>celle<br>d | absent  | pycnidia | ascomata<br>without<br>carbonize<br>d<br>structures                              | spores not<br>pigmented | orcinol<br>tridepside<br>s | chlorococco<br>id and other<br>green                                                                                    | 0,19634937                           | 7,63636<br>3636 | 83,178    |
| <i>Flavoparmelia caperata</i> (L.) Hale                                         | Fla.cap | 6 | 7 | 3 | 4 | 5 | 4 | foliose   | absent        | absent                   | soredia | absent   | absent                                                                           | absent                  |                            | aliphatic<br>acids+β-<br>orcinol<br>depsidone<br>s+usnic<br>acid<br>derivative<br>s                                     | chlorococco<br>id and other<br>green |                 |           |
| <i>Graphis scripta</i><br>(L.) Ach. s.l.                                        | Gra.scr | 3 | 5 | 4 | 4 | 5 | 3 | crustose  | lirella       | mult<br>i-<br>celle<br>d | absent  | absent   | ascomata<br>with<br>carbonize<br>d<br>structures<br>+ascomat<br>a with<br>pruina | spores not<br>pigmented | no<br>substance<br>s       | <i>Trentepohli</i><br><i>a</i>                                                                                          | 1,47262031<br>3                      | 4,88235<br>2941 | 1570,3989 |
| <i>Gyalecta fagicola</i>                                                        | Gya.fag | 5 | 5 | 4 | 7 | 6 | 2 | crustose  | Lecid         | mult                     | absent  | pycnidia | ascomata                                                                         | spores not              | no                         | <i>Trentepohli</i>                                                                                                      | 0,09621119                           | 5,88235         | 236,5059  |

|                                               |         |   |   |   |   |   |   |          |          |           |           |          |                                        |                                        |                                              |                               |                     |             |             |          |  |  |
|-----------------------------------------------|---------|---|---|---|---|---|---|----------|----------|-----------|-----------|----------|----------------------------------------|----------------------------------------|----------------------------------------------|-------------------------------|---------------------|-------------|-------------|----------|--|--|
| (Arnold) Kremp.                               |         |   |   |   |   |   |   |          |          | ose       | ea        | i-celled |                                        |                                        | with carbonized structures                   | pigmented                     | substances          | <i>a</i>    | 4           | 2941     |  |  |
| <i>Gyalecta flotowii</i> Körb.                | Gya.flo |   |   |   |   |   |   |          | crustose | Lecidea   | muriiform | absent   | absent                                 | ascomata without carbonized structures | spores not pigmented                         | no substances                 | <i>Trentepohlia</i> | 0,070685775 | 1,533333333 | 338,8009 |  |  |
| <i>Gyalecta truncigena</i> (Ach.) Hepp        | Gya.tru |   |   |   |   |   |   |          | crustose | Lecidea   | muriiform | absent   | absent                                 | ascomata without carbonized structures | spores not pigmented                         | no substances                 | <i>Trentepohlia</i> | 0,096211194 | 3           | 538,9388 |  |  |
| <i>Gyalecta ulmi</i> (Sw.) Zahlbr.            | Gya.ulm | 5 | 5 | 5 | 5 | 6 | 1 | crustose | Lecidea  | muriiform | absent    | absent   | ascomata without carbonized structures | spores not pigmented                   | no substances                                | <i>Trentepohlia</i>           | 0,5026544           | 2,916666667 | 329,9625    |          |  |  |
| <i>Hazslinszkya gibberulosa</i> (Ach.) Körb   | Haz.gib |   |   |   |   |   |   |          | crustose | Lecidea   | 1-celled  | absent   | absent                                 | ascomata with carbonized structures    | spores not pigmented                         | no substances                 | <i>Trentepohlia</i> | 0,1256      | 2,2666666   | 169,5735 |  |  |
| <i>Hypocenomyce scalaris</i> (Ach.) M. Choisy | Hyp.sca | 6 | 5 | 6 | 3 | 2 | 2 | crustose | absent   | absent    | soredia   | pycnidia | absent                                 | absent                                 | orcinol depsides                             | chlorococcoid and other green |                     |             |             |          |  |  |
| <i>Hypogymnia farinacea</i> Zopf              | Hpg.far | 6 | 4 | 6 | 7 | 3 | 2 | foliose  | absent   | absent    | soredia   | absent   | absent                                 | absent                                 | orcinol depsidone s+β-orcinol depsides       | chlorococcoid and other green |                     |             |             |          |  |  |
| <i>Hypogymnia physodes</i> (L.) Nyl.          | Hpg.phy | 7 |   | 6 | 3 | 3 | 3 | foliose  | absent   | absent    | soredia   | pycnidia | absent                                 | absent                                 | orcinol depsidone s+β-orcinol depsidone s+β- | chlorococcoid and other green |                     |             |             |          |  |  |







|                                                             |          |   |   |   |   |   |   |              |              |                  |         |          |                                                                                  |                         |                                                                      |                                      |                 |                 |          |
|-------------------------------------------------------------|----------|---|---|---|---|---|---|--------------|--------------|------------------|---------|----------|----------------------------------------------------------------------------------|-------------------------|----------------------------------------------------------------------|--------------------------------------|-----------------|-----------------|----------|
| <i>Lecidea turgidula</i><br>(Hoffm.) Ach                    | Lcd.tur  |   |   |   |   |   |   | crust<br>ose | Lecid<br>ea  | 1-<br>celle<br>d | absent  | pycnidia | ascomata<br>with<br>carbonize<br>d<br>structures<br>+ascomat<br>a with<br>pruina | spores not<br>pigmented | usnic acid<br>derivatives                                            | chlorococco<br>id and other<br>green | 0,1256636       | 2,28571<br>4286 | 51,3275  |
| <i>Lecidella<br/>elaechroma</i><br>(Ach.) M. Choisy         | Lcl.ela  | 6 | 5 | 6 | 3 | 6 | 5 | crust<br>ose | Lecid<br>ea  | 1-<br>celle<br>d | absent  | absent   | ascomata<br>with<br>carbonize<br>d<br>structures                                 | spores not<br>pigmented | xanthones                                                            | chlorococco<br>id and other<br>green | 1,32732177<br>5 | 1,8             | 397,7227 |
| <i>Lepra albescens</i><br>(Huds.) Hafellner                 | Lpr.alb  | 6 |   | 6 | 3 | 6 | 6 | crust<br>ose | absen<br>t   | abse<br>nt       | soredia | absent   | absent                                                                           | absent                  | aliphatic<br>acids                                                   | chlorococco<br>id and other<br>green |                 |                 |          |
| <i>Lepra amara</i><br>(Ach.) Hafellner                      | Lpr.ama  | 6 |   | 6 | 4 | 3 | 2 | crust<br>ose | absen<br>t   | abse<br>nt       | soredia | absent   | absent                                                                           | absent                  | other<br>substance<br>s+β-<br>orcinol<br>depsidone<br>s              | chlorococco<br>id and other<br>green |                 |                 |          |
| <i>Lepra ophthalmiza</i><br>(Nyl.) Hafellner                | Lpr.opht |   |   |   |   |   |   | crust<br>ose | Lecan<br>ora | 1-<br>celle<br>d | soredia | absent   | ascomata<br>with<br>carbonize<br>d<br>structures<br>+ascomat<br>a with<br>pruina | spores not<br>pigmented | aliphatic<br>acids                                                   | chlorococco<br>id and other<br>green | 0,19634937<br>5 | 2,33333<br>3333 | 263970   |
| <i>Lepraria finkii</i> (B.<br>de Lesd.) R.C.<br>Harris s.l. | Lep.fin  | 4 | 5 | 5 | 4 | 6 | 3 | lepro<br>se  | absen<br>t   | abse<br>nt       | soredia | absent   | absent                                                                           | absent                  | β-orcinol<br>depsidone<br>s+β-<br>orcinol<br>depsides+<br>terpenoids | chlorococco<br>id and other<br>green |                 |                 |          |
| <i>Lepraria incana</i><br>(L.) Ach.s.l.                     | Lep.inc  | 4 | 5 | 6 | 3 | 3 | 5 | lepro<br>se  | absen<br>t   | abse<br>nt       | soredia | absent   | absent                                                                           | absent                  | orcinol<br>depsides+<br>terpenoids                                   | chlorococco<br>id and other<br>green |                 |                 |          |

|                                                                                                   |         |   |   |   |   |   |   |          |          |               |         |          |                                        |                      |                                                          |                               |            |             |          |
|---------------------------------------------------------------------------------------------------|---------|---|---|---|---|---|---|----------|----------|---------------|---------|----------|----------------------------------------|----------------------|----------------------------------------------------------|-------------------------------|------------|-------------|----------|
| <i>Lobaria pulmonaria</i> (L.) Hoffm.                                                             | Lob.pul | 5 | 4 | 4 | 7 | 5 | 2 | folio se | Lecanora | mult i-celled | soredia | pycnidia | ascomata without carbonized structures | spores not pigmented | β-orcinol depsidones                                     | chlorococcoid and other green | 7,0685775  | 3,428571429 | 615,93   |
| <i>Lobarina scrobiculata</i> (Scop.) Nyl.                                                         | Lbr.scr | 7 | 4 | 3 | 7 | 5 | 1 | folio se | Lecanora | mult i-celled | soredia | absent   | ascomata without carbonized structures | spores not pigmented | β-orcinol depsidone s+usnic acid derivative              | chlorococcoid and other green | 1,76625    | 3,7272727   | 324,5579 |
| <i>Loxospora elatina</i> (Ach.) A.Massal.                                                         | Lox.ela | 5 | 4 | 2 | 6 | 3 | 2 | crustose | absent   | absent        | soredia | absent   | absent                                 | absent               | β-orcinol depsides                                       | chlorococcoid and other green |            |             |          |
| <i>Melanelixia glabrata</i> (Lamy) Sandler & Arup                                                 | Mel.gla |   |   |   |   |   |   | folio se | absent   | absent        | isidia  | pycnidia | absent                                 | absent               | orcinol depsides                                         | chlorococcoid and other green |            |             |          |
| <i>Melanelixia subaurifera</i> (Nyl.) O. Blanco, A. Crespo, Divakar, Essl., D. Hawksw. & Lumbsch  | Mel.sub | 6 | 5 | 5 | 5 | 6 | 5 | folio se | absent   | absent        | soredia | pycnidia | absent                                 | absent               | orcinol depsides                                         | chlorococcoid and other green |            |             |          |
| <i>Melanohalea exasperatula</i> (Nyl.) O. Blanco, A. Crespo, Divakar, Essl., D. Hawksw. & Lumbsch | Mlh.exa | 7 | 5 | 6 | 3 | 5 | 6 | folio se | absent   | absent        | isidia  | pycnidia | absent                                 | absent               | no substance                                             | chlorococcoid and other green |            |             |          |
| <i>Menegazzia terebrata</i> (Hoffm.) A. Massal.                                                   | Men.ter | 5 | 4 | 3 | 7 | 4 | 1 | folio se | absent   | absent        | soredia | pycnidia | absent                                 | absent               | aliphatic acids+β-orcinol depsidone s+β-orcinol depsides | chlorococcoid and other green |            |             |          |
| <i>Micarea denigrata</i>                                                                          | Mic.den | 8 |   | 6 | 3 | 3 | 7 | crust    | Lecid    | 2-            | absent  | pycnidia | ascomata                               | spores not           | orcinol                                                  | chlorococco                   | 0,08295761 | 4,71698     | 45,9754  |

|                                                                  |         |   |   |   |   |   |   |              |              |                          |         |          |                                                                                  |                                         |                                 |                                      |                       |                 |          |  |
|------------------------------------------------------------------|---------|---|---|---|---|---|---|--------------|--------------|--------------------------|---------|----------|----------------------------------------------------------------------------------|-----------------------------------------|---------------------------------|--------------------------------------|-----------------------|-----------------|----------|--|
| (Fr.) Hedl.                                                      |         |   |   |   |   |   |   | ose          | ea           | celle<br>d               |         |          |                                                                                  | without<br>carbonize<br>d<br>structures | pigmented                       | tridepside<br>s                      | id and other<br>green | 1               | 1132     |  |
| <i>Micarea elachista</i><br>(Körb.) Coppins &<br>R. Sant.        | Mic.ela |   |   |   |   |   |   | crust<br>ose | Lecid<br>ea  | 1-<br>celle<br>d         | absent  | pycnidia | ascomata<br>without<br>carbonize<br>d<br>structures                              | spores not<br>pigmented                 | no<br>substance<br>s            | chlorococco<br>id and other<br>green | 0,05309287<br>1       | 4,72727<br>2727 | 51,4912  |  |
| <i>Micarea melaena</i><br>(Nyl.) Hedl.                           | Mic.mel |   | 4 | 3 | 6 | 2 | 1 | crust<br>ose | Lecid<br>ea  | mult<br>i-<br>celle<br>d | absent  | pycnidia | ascomata<br>with<br>carbonize<br>d<br>structures                                 | spores not<br>pigmented                 | orcinol<br>tridepside<br>s      | chlorococco<br>id and other<br>green | 0,04908734<br>4       | 3,47368<br>4211 | 194,9823 |  |
| <i>Micarea prasina</i><br>Fr. s.l.                               | Mic.pra | 3 | 4 | 4 | 4 | 4 | 4 | crust<br>ose | Lecid<br>ea  | 2-<br>celle<br>d         | absent  | pycnidia | ascomata<br>without<br>carbonize<br>d<br>structures                              | spores not<br>pigmented                 | diphenyl<br>ethers              | chlorococco<br>id and other<br>green | 0,07068577<br>5       | 2,85714<br>2857 | 64,1594  |  |
| <i>Microcalicium<br/>disseminatum</i><br>(Ach.) Vainio           | Mcr.dis |   |   |   |   |   |   | crust<br>ose | stalke<br>d  | mult<br>i-<br>celle<br>d | absent  | pycnidia | ascomata<br>with<br>carbonize<br>d<br>structures                                 | spores<br>pigmented                     | no<br>substance<br>s            | algae absent                         | 0,0314159             | 3,42857<br>1429 | 76,9913  |  |
| <i>Myriolecis hagenii</i><br>(Ach.) Śliwa, Zhao<br>Xin & Lumbsch | Myr.hag | 6 |   | 6 | 3 | 8 | 7 | crust<br>ose | Lecan<br>ora | 1-<br>celle<br>d         | absent  | absent   | ascomata<br>with<br>carbonize<br>d<br>structures<br>+ascomat<br>a with<br>pruina | spores not<br>pigmented                 | no<br>substance<br>s            | chlorococco<br>id and other<br>green | 0,15904299<br>4       | 2               | 151,5766 |  |
| <i>Normandina<br/>pulchella</i> (Borrer)<br>Nyl.                 | Nor.pul | 6 | 5 | 3 | 5 | 5 | 4 | folio<br>se  | absen<br>t   | absen<br>t               | soredia | absent   | absent                                                                           | absent                                  | no<br>substance<br>s            | chlorococco<br>id and other<br>green |                       |                 |          |  |
| <i>Ochrolechia<br/>androgyna</i><br>(Hoffm.) Arnold              | Och.and | 5 | 4 | 6 | 7 | 3 | 3 | crust<br>ose | absen<br>t   | absen<br>t               | soredia | absent   | absent                                                                           | absent                                  | orcinol<br>depsides+<br>orcinol | chlorococco<br>id and other<br>green |                       |                 |          |  |

|                                                       |         |   |   |   |   |   |   |          |         |             |         |          |                                     |                      |  |                                                              |                               |             |             |          |
|-------------------------------------------------------|---------|---|---|---|---|---|---|----------|---------|-------------|---------|----------|-------------------------------------|----------------------|--|--------------------------------------------------------------|-------------------------------|-------------|-------------|----------|
| s.l.                                                  |         |   |   |   |   |   |   |          |         |             |         |          |                                     |                      |  | tridepsides                                                  |                               |             |             |          |
| <i>Ochrolechia arborea</i> (Kreyer) Almb.             | Och.arb | 6 | 5 | 4 | 6 | 4 | 3 | crustose | absent  | absent      | soredia | absent   | absent                              | absent               |  | orcinol depsides+ orcinol tridepsides+xanthon                | chlorococcoid and other green |             |             |          |
| <i>Ochrolechia turneri</i> (Sm.) Hasselrot            | Och.tur |   |   |   |   |   |   | crustose | absent  | absent      | soredia | absent   | absent                              | absent               |  | orcinol depsidone s+orcinol depsides                         | chlorococcoid and other green |             |             |          |
| <i>Opegrapha niveoatra</i> (Borrer) J. R. Laundon     | Ope.niv |   |   |   |   |   |   | crustose | lirella | multicelled | absent  | pycnidia | ascomata with carbonized structures | spores not pigmented |  | no substances                                                | <i>Trentepohlia</i>           | 0,076576256 | 7,692307692 | 138,3027 |
| <i>Opegrapha vermicellifera</i> (Kunze) J. R. Laundon | Ope.ver | 3 | 8 | 2 | 4 | 5 | 3 | crustose | lirella | multicelled | absent  | pycnidia | ascomata with carbonized structures | spores not pigmented |  | no substances                                                | <i>Trentepohlia</i>           | 0,08482293  | 5,857142857 | 131,5267 |
| <i>Parmelia saxatilis</i> (L.) Ach. s.l.              | Par.sax | 6 |   | 6 | 5 | 3 | 3 | foliose  | absent  | absent      | isidia  | pycnidia | absent                              | absent               |  | orcinol depsidone s+β-orcinol depsidone s+β-orcinol depsides | chlorococcoid and other green |             |             |          |
| <i>Parmelia sulcata</i> Taylor s.l.                   | Par.sul | 7 |   | 6 | 3 | 5 | 7 | foliose  | absent  | absent      | soredia | pycnidia | absent                              | absent               |  | β-orcinol depsidone s+β-orcinol depsides                     | chlorococcoid and other green |             |             |          |
| <i>Parmeliopsis ambigua</i> (Wulfen) Nyl.             | Prm.amb | 6 | 4 | 6 | 5 | 2 | 2 | foliose  | absent  | absent      | soredia | absent   | absent                              | absent               |  | orcinol depsides+ β-orcinol                                  | chlorococcoid and other green |             |             |          |



|                                                       |         |   |   |   |   |   |   |              |              |                  |            |          |                                                                                  | d<br>structures         |                                      |                                      |                                      |                 |            |  |  |  |  |  |  |  |  |
|-------------------------------------------------------|---------|---|---|---|---|---|---|--------------|--------------|------------------|------------|----------|----------------------------------------------------------------------------------|-------------------------|--------------------------------------|--------------------------------------|--------------------------------------|-----------------|------------|--|--|--|--|--|--|--|--|
| <i>Phaeophyscia<br/>nigricans</i> (Flörke)<br>Moberg  | Pha.nig | 8 |   | 6 |   | 8 | 9 | folio<br>se  | absen<br>t   | abse<br>nt       | isidia     | absent   | absent                                                                           | absent                  | no<br>substance<br>s                 | chlorococco<br>id and other<br>green |                                      |                 |            |  |  |  |  |  |  |  |  |
| <i>Phaeophyscia<br/>orbicularis</i> (Neck.)<br>Moberg | Pha.orb | 7 |   | 6 |   | 7 | 9 | folio<br>se  | absen<br>t   | abse<br>nt       | soredia    | pycnidia | absent                                                                           | absent                  | no<br>substance<br>s                 | chlorococco<br>id and other<br>green |                                      |                 |            |  |  |  |  |  |  |  |  |
| <i>Phlyctis agelaea</i><br>(Ach.) Flot.               | Phl.age | 5 | 6 | 3 | 4 | 6 | 1 | crust<br>ose | Lecan<br>ora | muri<br>form     | soredia    | absent   | ascomata<br>without<br>carbonize<br>d                                            | spores not<br>pigmented | β-orcinol<br>depsidone<br>s          | chlorococco<br>id and other<br>green | 0,0961625                            | 3,51351<br>3514 | 11642,2968 |  |  |  |  |  |  |  |  |
| <i>Phlyctis argena</i><br>(Spreng.) Flot.             | Phl.arg | 5 |   | 5 | 4 | 3 | 4 | 5            | crust<br>ose | absen<br>t       | abse<br>nt | soredia  | absent                                                                           | absent                  | absent                               | β-orcinol<br>depsidone<br>s          | chlorococco<br>id and other<br>green |                 |            |  |  |  |  |  |  |  |  |
| <i>Physcia<br/>adscendens</i> (Fr.)<br>H. Olivier     | Psc.ads | 7 |   | 6 | 3 | 7 | 8 | folio<br>se  | Lecan<br>ora | 2-<br>celle<br>d | soredia    | pycnidia | ascomata<br>with<br>carbonize<br>d<br>structures<br>+ascomat<br>a with<br>pruina | spores<br>pigmented     | β-orcinol<br>depsides                | chlorococco<br>id and other<br>green | 1,2265625                            | 2,29411<br>7647 | 737,3171   |  |  |  |  |  |  |  |  |
| <i>Physcia aipolia</i><br>(Ehrh. ex Humb.)<br>Fűrnr.  | Psc.aip | 7 |   | 6 | 3 | 7 | 5 | folio<br>se  | Lecan<br>ora | 2-<br>celle<br>d | absent     | pycnidia | ascomata<br>with<br>carbonize<br>d<br>structures<br>+ascomat<br>a with<br>pruina | spores<br>pigmented     | β-orcinol<br>depsides+<br>terpenoids | chlorococco<br>id and other<br>green | 2,40527984<br>4                      | 2,47058<br>8235 | 794,6597   |  |  |  |  |  |  |  |  |
| <i>Physcia stellaris</i><br>(L.) Nyl.                 | Psc.ste | 7 | 4 | 6 | 3 | 6 | 6 | folio<br>se  | Lecan<br>ora | 2-<br>celle<br>d | absent     | pycnidia | ascomata<br>with<br>carbonize<br>d<br>structures<br>+ascomat                     | spores<br>pigmented     | β-orcinol<br>depsides                | chlorococco<br>id and other<br>green | 3,14159                              | 2,05555<br>5556 | 784,8394   |  |  |  |  |  |  |  |  |



|                                                                      |         |   |   |   |   |   |   |               |                |                          |         |          |                                                     |                         |                                                              |                                      |                       |                 |           |  |
|----------------------------------------------------------------------|---------|---|---|---|---|---|---|---------------|----------------|--------------------------|---------|----------|-----------------------------------------------------|-------------------------|--------------------------------------------------------------|--------------------------------------|-----------------------|-----------------|-----------|--|
| <i>furfuracea</i> (L.)<br>Zopf                                       |         |   |   |   |   |   |   | ose           | t              | nt                       |         |          |                                                     |                         |                                                              | depsides+<br>β-orcinol<br>depsides   | id and other<br>green |                 |           |  |
| <i>Pseudoschismatom<br/>ma rufescens</i><br>(Pers.) Ertz &<br>Tehler | Peu.ruf | 3 | 6 | 3 | 4 | 6 | 5 | crust<br>ose  | lirella        | mult<br>i-<br>celle<br>d | absent  | pycnidia | ascomata<br>with<br>carbonize<br>d<br>structures    | spores not<br>pigmented | no<br>substance<br>s                                         | <i>Trentepohli<br/>a</i>             | 0,03864155<br>7       | 5,5             | 92,18     |  |
| <i>Pyrenula laevigata</i><br>(Pers.) Arnold                          | Pyr.lae |   |   |   |   |   |   | crust<br>ose  | perith<br>ecia | mult<br>i-<br>celle<br>d | absent  | pycnidia | ascomata<br>with<br>carbonize<br>d<br>structures    | spores<br>pigmented     | xanthones                                                    | <i>Trentepohli<br/>a</i>             | 0,24192206<br>5       | 2,29411<br>7647 | 737,8983  |  |
| <i>Pyrenula nitida</i><br>(Weigel) Ach.                              | Pyr.nit | 3 | 7 | 3 | 4 | 5 | 2 | crust<br>ose  | perith<br>ecia | mult<br>i-<br>celle<br>d | absent  | pycnidia | ascomata<br>with<br>carbonize<br>d<br>structures    | spores<br>pigmented     | antraquin<br>oses                                            | <i>Trentepohli<br/>a</i>             | 0,38484477<br>5       | 3,07142<br>8571 | 551,7706  |  |
| <i>Pyrenula nitidella</i><br>(Flörke ex Schaer.)<br>Müll. Arg.       | Pyr.ntd | 3 | 7 | 2 | 4 | 5 | 1 | crust<br>ose  | perith<br>ecia | mult<br>i-<br>celle<br>d | absent  | absent   | ascomata<br>with<br>carbonize<br>d<br>structures    | spores<br>pigmented     | antraquin<br>oses                                            | <i>Trentepohli<br/>a</i>             | 0,04908734<br>4       | 2,46153<br>8462 | 1194,9356 |  |
| <i>Ramalina<br/>farinacea</i> (L.) Ach.                              | Ram.far | 6 | 5 | 6 | 4 | 5 | 4 | frutic<br>ose | Lecan<br>ora   | 2-<br>celle<br>d         | soredia | absent   | ascomata<br>without<br>carbonize<br>d<br>structures | spores not<br>pigmented | β-orcinol<br>depsidone<br>s+usnic<br>acid<br>derivative<br>s | chlorococco<br>id and other<br>green | 12,56                 | 1,91666<br>6667 | 216,6617  |  |
| <i>Ramalina<br/>pollinaria</i> (Westr.)<br>Ach.                      | Ram.pol | 7 |   | 5 | 5 | 4 | 5 | frutic<br>ose | Lecan<br>ora   | 2-<br>celle<br>d         | soredia | absent   | ascomata<br>without<br>carbonize<br>d<br>structures | spores not<br>pigmented | orcinol<br>depsides+<br>usnic acid<br>derivative<br>s        | chlorococco<br>id and other<br>green | 12,56                 | 2,5             | 163,5429  |  |
| <i>Ramalina thrausta</i><br>(Ach.) Nyl.                              | Ram.thr |   |   |   |   |   |   | frutic<br>ose | absen<br>t     | abse<br>nt               | soredia | absent   | absent                                              | absent                  | usnic acid<br>derivative<br>s                                | chlorococco<br>id and other<br>green |                       |                 |           |  |
| <i>Reichlingia</i>                                                   | Rei.leo |   |   |   |   |   |   | lepro         | absen          | abse                     | soredia | sporodoc | absent                                              | absent                  | orcinol                                                      | <i>Trentepohli</i>                   |                       |                 |           |  |

| <i>leopoldii</i> Diederich & Scheid.                   |         |   |   |   |   |   |   |           |          | se          | t       | nt       | hia                                    |                      | depsides                       |                               | <i>a</i>    |             |          |
|--------------------------------------------------------|---------|---|---|---|---|---|---|-----------|----------|-------------|---------|----------|----------------------------------------|----------------------|--------------------------------|-------------------------------|-------------|-------------|----------|
| <i>Rinodina pyrina</i> (Ach.) Arnold                   | Rin.pyr | 7 | 4 | 6 | 5 | 7 | 3 | crustose  | Lecanora | 2-celled    | absent  | absent   | ascomata without carbonized structures | spores pigmented     | no substance                   | chlorococcoid and other green | 0,07068577  | 2,153846154 | 309,7981 |
| <i>Schismatomma pericleum</i> (Ach.) Branth & Rostrup  | Sch.per | 3 | 4 | 4 | 6 | 3 | 1 | crustose  | Lecanora | multicelled | absent  | absent   | ascomata with carbonized structures    | spores not pigmented | aliphatic acids                | <i>Trentepohlia</i>           | 0,096211194 | 10,30769231 | 185,3257 |
| <i>Scoliciosporum chlorococcum</i> (Stenh.) Vězda s.l. | Sco.chl | 6 | 5 | 3 | 3 | 3 | 6 | crustose  | Lecidea  | multicelled | absent  | absent   | ascomata without carbonized structures | spores not pigmented | no substance                   | chlorococcoid and other green | 0,070685775 | 6,666666666 | 318,1781 |
| <i>Thelotrema lepadinum</i> (Ach.) Ach.                | The.lep | 4 | 6 | 3 | 7 | 4 | 1 | crustose  | Lecanora | multicelled | absent  | absent   | ascomata without carbonized structures | spores not pigmented | no substance                   | <i>Trentepohlia</i>           | 1,767144375 | 4,875       | 20426,25 |
| <i>Trapeliopsis flexuosa</i> (Fr.) Coppins & P. James  | Tra.fle | 7 |   | 6 | 3 | 2 | 5 | crustose  | Lecidea  | 1-celled    | soredia | absent   | ascomata without carbonized structures | spores not pigmented | orcinol tripeptides            | chlorococcoid and other green | 0,159042994 | 2,538461538 | 45,6399  |
| <i>Trapeliopsis granulosa</i> (Hoffm.) Lumbsch         | Tra.gla | 8 |   | 6 |   | 1 | 2 | crustose  | Lecidea  | 1-celled    | soredia | absent   | ascomata without carbonized structures | spores not pigmented | orcinol tripeptides            | chlorococcoid and other green | 0,331830444 | 2,3         | 150,5781 |
| <i>Tuckermanopsis chlorophylla</i> (Willd.) Hale       | Tuc.chl | 6 | 4 | 6 | 6 | 3 | 3 | foliose   | absent   | absent      | soredia | pycnidia | absent                                 | absent               | aliphatic acids                | chlorococcoid and other green |             |             |          |
| <i>Usnea ceratina</i> Ach.                             | Usn.cer |   |   |   |   |   |   | fruticose | absent   | absent      | isidia  | absent   | absent                                 | absent               | β-orcinol depsides+ usnic acid | chlorococcoid and other green |             |             |          |

|                                                              |         |   |   |   |   |   |   |           |         |          |          |          |                         |                                        |                                                             |                               |                               |             |         |        |
|--------------------------------------------------------------|---------|---|---|---|---|---|---|-----------|---------|----------|----------|----------|-------------------------|----------------------------------------|-------------------------------------------------------------|-------------------------------|-------------------------------|-------------|---------|--------|
|                                                              |         |   |   |   |   |   |   |           |         |          |          |          |                         | derivatives                            |                                                             |                               |                               |             |         |        |
| <i>Usnea dasopoga</i> (Ach.) Nyl.                            | Usn.das | 7 | 4 | 6 | 6 | 3 | 2 | fruticose | absent  | absent   | isidia   | absent   | absent                  | absent                                 | β-orcinol depsidones+usnic acid derivatives                 | chlorococcoid and other green |                               |             |         |        |
| <i>Usnea florida</i> (L.) Weber ex F.H. Wigg.                | Usn.flo | 7 | 6 | 2 | 7 | 5 | 2 | fruticose | absent  | absent   | soredia  | absent   | absent                  | absent                                 | β-orcinol depsides+usnic acid derivatives                   | chlorococcoid and other green |                               |             |         |        |
| <i>Usnea hirta</i> (L.) F. H. Wigg.                          | Usn.hir | 7 | 4 | 6 | 5 | 3 | 4 | fruticose | absent  | absent   | isidia   | absent   | absent                  | absent                                 | aliphatic acids+usnic acid derivatives                      | chlorococcoid and other green |                               |             |         |        |
| <i>Varicellaria hemisphaerica</i> (Flörke) Schmitt & Lumbsch | Var.hem | 5 | 6 | 3 | 5 | 4 | 3 | crustose  | absent  | absent   | soredia  | absent   | absent                  | absent                                 | orcinol depsides                                            | chlorococcoid and other green |                               |             |         |        |
| <i>Vulpicida pinastri</i> (Scop.) J.-E. Mattson & M. J. Lai  | Vul.pin | 6 | 3 | 6 | 7 | 2 | 2 | foliose   | absent  | absent   | soredia  | absent   | absent                  | absent                                 | pulvinic acid derivatives+usnic acid derivatives+terpenoids | chlorococcoid and other green |                               |             |         |        |
| <i>Xanthoria parietina</i> (L.) Th. Fr.                      | Xan.par | 7 |   |   |   | 3 | 7 | 8         | foliose | Lecanora | 2-celled | absent   | pycnidia                | ascomata without carbonized structures | spores not pigmented                                        | antraquinones                 | chlorococcoid and other green | 4,908734375 | 1,75    | 469,28 |
| <i>Xylopsora caradocensis</i> (Leight. ex Nyl.)              | Xyl.car | 5 | 5 | 2 | 6 | 2 | 1 | crustose  | Lecidea | 2-celled | absent   | pycnidia | ascomata with carbonize | spores not pigmented                   | no substances                                               | chlorococcoid and other green | 0,1256636                     | 3,117647059 | 64,1782 |        |

| Bendiksby & Timdal                               |         |   |   |   |   |   |   |          |           |             |        |          |                       | d structures     |               |                     |                      |           |  |
|--------------------------------------------------|---------|---|---|---|---|---|---|----------|-----------|-------------|--------|----------|-----------------------|------------------|---------------|---------------------|----------------------|-----------|--|
|                                                  |         |   |   |   |   |   |   |          |           |             |        |          |                       | ascomata         |               |                     |                      |           |  |
| <i>Zwackhia viridis</i> (Ach.) Poetsch & Schied. | Zwa.vir | 3 | 6 | 3 | 5 | 5 | 2 | crustose | apothecia | multicelled | absent | pycnidia | carbonized structures | spores pigmented | no substances | <i>Trentepohlia</i> | 0,110741045,53333333 | 1222,6289 |  |

**Table S2.** Parameters of variables passively fitted to results of the PCA ordinations showing temporal shifts in composition of lichen species at forest community level. Determination coefficients  $R^2$  and P-values were estimated using permutation tests with 999 iterations. Abbreviations: CWM – community weighted mean; WEIV – Wirth ecological indicator value. Significant results are in **bold**.

| Parameter                           | Code    | PC1      | PC2     | $R^2$  | P            |
|-------------------------------------|---------|----------|---------|--------|--------------|
| Coniferous forest communities:      |         |          |         |        |              |
| Functional richness                 | FRic    | −0.993   | −0.109  | 0.792  | <b>0.001</b> |
| Functional evenness                 | FEve    | 0.075    | 0.997   | 0.335  | <b>0.001</b> |
| Functional dispersion               | FDis    | −0.981   | 0.190   | 0.673  | <b>0.001</b> |
| Functional divergence               | FDiv    | −0.866   | −0.499  | 0.157  | <b>0.002</b> |
| CWM of ascomata area                | AscArea | −0.509   | 0.860   | 0.143  | <b>0.001</b> |
| CWM of ascospore volume             | SporVol | −0.957   | 0.286   | 0.495  | <b>0.001</b> |
| CWM of ascospore shape              | SporShp | −0.432   | 0.901   | 0.480  | <b>0.001</b> |
| CWM of light WEIV                   | WEIV.L  | 0.778    | −0.627  | 0.779  | <b>0.001</b> |
| CWM of temperature WEIV             | WEIV.T  | −0.887   | 0.461   | 0.770  | <b>0.001</b> |
| CWM of continentality WEIV          | WEIV.C  | 0.847    | −0.531  | 0.841  | <b>0.001</b> |
| CWM of moisture WEIV                | WEIV.M  | 0.823    | 0.566   | 0.193  | <b>0.001</b> |
| CWM of nitrogen WEIV                | WEIV.N  | −0.967   | −0.253  | 0.414  | <b>0.001</b> |
| Shannon index                       | Shan    | −0.930   | −0.366  | 0.813  | <b>0.001</b> |
| Species richness                    | Rich    | −0.947   | −0.319  | 0.836  | <b>0.001</b> |
| Mixed deciduous forest communities: |         |          |         |        |              |
| Functional richness                 | FRic    | −0.99821 | 0.05981 | 0.6692 | <b>0.001</b> |
| Functional evenness                 | FEve    | 0.97743  | 0.21126 | 0.1339 | <b>0.001</b> |
| Functional dispersion               | FDis    | −0.628   | −0.777  | 0.066  | <b>0.029</b> |
| Functional divergence               | FDiv    | 0.379    | 0.925   | 0.109  | <b>0.002</b> |
| CWM of ascomata area                | AscArea | −0.064   | −0.997  | 0.153  | <b>0.001</b> |
| CWM of ascospore volume             | SporVol | −0.053   | −0.998  | 0.207  | <b>0.001</b> |
| CWM of ascospore shape              | SporShp | 0.343    | −0.939  | 0.038  | 0.133        |
| CWM of light WEIV                   | WEIV.L  | −0.125   | 0.992   | 0.341  | <b>0.001</b> |
| CWM of temperature WEIV             | WEIV.T  | 0.087    | −0.996  | 0.688  | <b>0.001</b> |
| CWM of continentality WEIV          | WEIV.C  | 0.053    | 0.998   | 0.641  | <b>0.001</b> |
| CWM of moisture WEIV                | WEIV.M  | 0.291    | 0.956   | 0.131  | <b>0.001</b> |
| CWM of nitrogen WEIV                | WEIV.N  | −0.777   | −0.629  | 0.369  | <b>0.001</b> |
| Shannon index                       | Shan    | −0.998   | 0.055   | 0.742  | <b>0.001</b> |
| Species richness                    | Rich    | −0.997   | 0.065   | 0.793  | <b>0.001</b> |
| Wet forest communities:             |         |          |         |        |              |
| Functional richness                 | FRic    | 0.986    | −0.160  | 0.829  | <b>0.001</b> |
| Functional evenness                 | FEve    | −0.972   | 0.234   | 0.140  | <b>0.004</b> |

|                            |         |        |        |       |              |
|----------------------------|---------|--------|--------|-------|--------------|
| Functional dispersion      | FDis    | 0.326  | -0.945 | 0.265 | <b>0.001</b> |
| Functional divergence      | FDiv    | -0.083 | 0.996  | 0.037 | 0.216        |
| CWM of ascomata area       | AscArea | 0.128  | -0.991 | 0.156 | <b>0.002</b> |
| CWM of ascospore volume    | SporVol | 0.466  | -0.884 | 0.129 | <b>0.006</b> |
| CWM of ascospore shape     | SporShp | -0.570 | -0.821 | 0.371 | <b>0.001</b> |
| CWM of light WEIV          | WEIV.L  | 0.635  | 0.772  | 0.347 | <b>0.001</b> |
| CWM of temperature WEIV    | WEIV.T  | -0.125 | -0.992 | 0.764 | <b>0.001</b> |
| CWM of continentality WEIV | WEIV.C  | 0.224  | 0.974  | 0.543 | <b>0.001</b> |
| CWM of moisture WEIV       | WEIV.M  | -0.808 | 0.588  | 0.162 | <b>0.001</b> |
| CWM of nitrogen WEIV       | WEIV.N  | 0.986  | -0.162 | 0.412 | <b>0.001</b> |
| Shannon index              | Shan    | 0.993  | -0.114 | 0.884 | <b>0.001</b> |
| Species richness           | Rich    | 0.992  | -0.118 | 0.880 | <b>0.001</b> |

**Table S3.** Parameters of mixed effect models showing temporal shifts in lichen species' functional diversity components, community weighted means of functional traits, Shannon index and species richness regarding coniferous forest communities. For testing shifts in species richness over time, the generalized mixed effects model with Poisson distribution was employed, while regarding remaining parameters of lichen species composition the linear mixed models were used. Abbreviations: CWM – community weighted mean; WEIV – Wirth ecological indicator value. Significant results are in **bold**.

|                       | Random effects | Variance | SD    | Mixed model parameters | –                |
|-----------------------|----------------|----------|-------|------------------------|------------------|
| Functional richness   | Plot id        | 4.039    | 2.010 | $R_m^2$                | 0.259            |
|                       | Residuals      | 1.944    | 1.394 | $R_c^2$                | 0.759            |
|                       | Fixed effects  | Estimate | SE    | t                      | Pr(> t )         |
|                       | (Intercept)    | 4.464    | 0.345 | 12.910                 | <b>&lt;0.001</b> |
|                       | Time           | 2.882    | 0.278 | 10.340                 | <b>&lt;0.001</b> |
| Functional evenness   | Random effects | Variance | SD    | Mixed model parameters | –                |
|                       | Plot id        | <0.001   | 0.005 | $R_m^2$                | 0.202            |
|                       | Residuals      | <0.001   | 0.014 | $R_c^2$                | 0.306            |
|                       | Fixed effects  | Estimate | SE    | t                      | Pr(> t )         |
|                       | (Intercept)    | 0.858    | 0.002 | 382.687                | <b>&lt;0.001</b> |
| Functional dispersion | Time           | -0.015   | 0.002 | -5.375                 | <b>&lt;0.001</b> |
|                       | Random effects | Variance | SD    | Mixed model parameters | –                |
|                       | Plot id        | <0.001   | 0.020 | $R_m^2$                | 0.094            |
|                       | Residuals      | <0.001   | 0.011 | $R_c^2$                | 0.781            |
|                       | Fixed effects  | Estimate | SE    | t                      | Pr(> t )         |
| Functional divergence | (Intercept)    | 0.332    | 0.003 | 101.764                | <b>&lt;0.001</b> |
|                       | Time           | 0.014    | 0.002 | 6.539                  | <b>0.001</b>     |
|                       | Random effects | Variance | SD    | Mixed model parameters | –                |
|                       | Plot id        | <0.001   | 0.004 | $R_m^2$                | 0.104            |

|                            |                |             |          |                        |          |   |
|----------------------------|----------------|-------------|----------|------------------------|----------|---|
|                            | Residuals      | <0.001      | 0.028    | $R_c^2$                | 0.137    |   |
|                            | Fixed effects  | Estimate    | SE       | t                      | Pr(> t ) |   |
|                            | (Intercept)    | 0.854       | 0.004    | 210.448                | <0.001   |   |
|                            | Time           | 0.019       | 0.005    | 3.456                  | 0.001    |   |
|                            | Random effects | Variance    | SD       | Mixed model parameters |          | – |
| CWM of ascomata area       | Plot id        | 0.012       | 0.112    | $R_m^2$                | 0.031    |   |
|                            | Residuals      | 0.135       | 0.368    | $R_c^2$                | 0.113    |   |
|                            | Fixed effects  | Estimate    | SE       | t                      | Pr(> t ) |   |
|                            | (Intercept)    | 0.972       | 0.054    | 17.867                 | <0.001   |   |
|                            | Time           | -0.138      | 0.073    | -1.875                 | 0.076    |   |
| CWM of ascospore volume    | Random effects | Variance    | SD       | Mixed model parameters |          | – |
|                            | Plot id        | 2416878.000 | 1555.000 | $R_m^2$                | 0.041    |   |
|                            | Residuals      | 7150987.000 | 2674.000 | $R_c^2$                | 0.283    |   |
|                            | Fixed effects  | Estimate    | SE       | t                      | Pr(> t ) |   |
|                            | (Intercept)    | 1117.500    | 437.400  | 2.555                  | 0.012    |   |
| CWM of ascospore shape     | Time           | 1274.500    | 534.800  | 2.383                  | 0.042    |   |
|                            | Random effects | Variance    | SD       | Mixed model parameters |          | – |
|                            | Plot id        | 0.042       | 0.206    | $R_m^2$                | 0.106    |   |
|                            | Residuals      | 0.070       | 0.265    | $R_c^2$                | 0.443    |   |
|                            | Fixed effects  | Estimate    | SE       | t                      | Pr(> t ) |   |
| CWM of light WEIV          | (Intercept)    | 3.207       | 0.047    | 67.427                 | <0.001   |   |
|                            | Time           | -0.231      | 0.053    | -4.352                 | <0.001   |   |
|                            | Random effects | Variance    | SD       | Mixed model parameters |          | – |
|                            | Plot id        | 0.103       | 0.322    | $R_m^2$                | 0.002    |   |
|                            | Residuals      | 0.027       | 0.164    | $R_c^2$                | 0.793    |   |
| CWM of temperature WEIV    | Fixed effects  | Estimate    | SE       | t                      | Pr(> t ) |   |
|                            | (Intercept)    | 5.526       | 0.051    | 108.076                | <0.001   |   |
|                            | Time           | 0.031       | 0.032    | 0.969                  | 0.660    |   |
|                            | Random effects | Variance    | SD       | Mixed model parameters |          | – |
|                            | Plot id        | 0.049       | 0.221    | $R_m^2$                | 0.008    |   |
| CWM of continentality WEIV | Residuals      | 0.007       | 0.086    | $R_c^2$                | 0.868    |   |
|                            | Fixed effects  | Estimate    | SE       | t                      | Pr(> t ) |   |
|                            | (Intercept)    | 4.559       | 0.033    | 135.557                | <0.001   |   |
|                            | Time           | 0.044       | 0.017    | 2.595                  | 0.348    |   |
|                            | Random effects | Variance    | SD       | Mixed model parameters |          | – |
|                            | Plot id        | 0.076       | 0.276    | $R_m^2$                | 0.001    |   |
|                            | Residuals      | 0.016       | 0.127    | $R_c^2$                | 0.825    |   |

|                      |                |          |       |                        |                  |
|----------------------|----------------|----------|-------|------------------------|------------------|
|                      | Fixed effects  | Estimate | SE    | t                      | Pr(> t )         |
|                      | (Intercept)    | 5.282    | 0.042 | 122.950                | <b>&lt;0.001</b> |
|                      | Time           | -0.023   | 0.025 | -0.918                 | 0.702            |
| CWM of moisture WEIV | Random effects | Variance | SD    | Mixed model parameters |                  |
|                      | Plot id        | 0.003    | 0.058 | $R_m^2$                | 0.208            |
|                      | Residuals      | 0.023    | 0.153 | $R_c^2$                | 0.309            |
|                      | Fixed effects  | Estimate | SE    | t                      | Pr(> t )         |
|                      | (Intercept)    | 4.304    | 0.023 | 185.158                | <b>&lt;0.001</b> |
|                      | Time           | -0.168   | 0.030 | -5.473                 | <b>&lt;0.001</b> |
| CWM of nitrogen WEIV | Random effects | Variance | SD    | Mixed model parameters |                  |
|                      | Plot id        | 0.017    | 0.130 | $R_m^2$                | 0.234            |
|                      | Residuals      | 0.030    | 0.175 | $R_c^2$                | 0.508            |
|                      | Fixed effects  | Estimate | SE    | t                      | Pr(> t )         |
|                      | (Intercept)    | 3.00     | 0.030 | 97.079                 | <b>&lt;0.001</b> |
|                      | Time           | 0.240    | 0.035 | 6.867                  | <b>&lt;0.001</b> |
| Shannon index        | Random effects | Variance | SD    | Mixed model parameters |                  |
|                      | Plot id        | 0.034    | 0.186 | $R_m^2$                | 0.412            |
|                      | Residuals      | 0.028    | 0.169 | $R_c^2$                | 0.733            |
|                      | Fixed effects  | Estimate | SE    | t                      | Pr(> t )         |
|                      | (Intercept)    | 3.418    | 0.035 | 95.940                 | <b>&lt;0.001</b> |
|                      | Time           | 0.420    | 0.033 | 12.390                 | <b>&lt;0.001</b> |
| Species richness     | Random effects | Variance | SD    | Mixed model parameters |                  |
|                      | Plot id        | 0.037    | 0.194 | $R_m^2$                | 0.442            |
|                      | Residuals      |          |       | $R_c^2$                | 0.791            |
|                      | Fixed effects  | Estimate | SE    | z                      | Pr(> z )         |
|                      | (Intercept)    | 3.523    | 0.036 | 96.050                 | <b>&lt;0.001</b> |
|                      | Time           | 0.436    | 0.030 | 14.180                 | <b>&lt;0.001</b> |

**Table S4.** Parameters of mixed effect models showing temporal shifts in lichen species' functional diversity components, community weighted means of functional traits, Shannon index and species richness regarding mixed deciduous forest communities. For testing shifts in species richness over time, the generalized mixed effects model with Poisson distribution was employed, while regarding remaining parameters of lichen species composition the linear mixed models were used. Note that regarding functional dispersion, the model assumptions were not met due to the very small variance of random effects. Abbreviations: CWM – community weighted mean; WEIV – Wirth ecological indicator value. Significant results are in **bold**.

|                            |                       |                 |           |                               |          |
|----------------------------|-----------------------|-----------------|-----------|-------------------------------|----------|
| <b>Functional richness</b> | <b>Random effects</b> | <b>Variance</b> | <b>SD</b> | <b>Mixed model parameters</b> | <b>–</b> |
|                            | Plot id               | 0.104           | 0.323     | $R_m^2$                       | 0.530    |
|                            | Residuals             | 1.708           | 1.307     | $R_c^2$                       | 0.557    |
|                            | Fixed effects         | Estimate        | SE        | t                             | Pr(> t ) |

|                         |                |              |          |                        |                  |
|-------------------------|----------------|--------------|----------|------------------------|------------------|
|                         | (Intercept)    | 6.743        | 0.181    | 37.140                 | <b>&lt;0.001</b> |
|                         | Time           | 2.851        | 0.249    | 11.440                 | <b>&lt;0.001</b> |
| Functional evenness     | Random effects | Variance     | SD       | Mixed model parameters | –                |
|                         | Plot id        | <0.001       | 0.003    | $R_m^2$                | 0.128            |
|                         | Residuals      | <0.001       | 0.013    | $R_c^2$                | 0.173            |
|                         | Fixed effects  | Estimate     | SE       | t                      | Pr(> t )         |
|                         | (Intercept)    | 0.867        | 0.001    | 477.252                | <b>&lt;0.001</b> |
|                         | Time           | -0.010       | 0.002    | -4.114                 | <b>&lt;0.001</b> |
| Functional dispersion   | Random effects | Variance     | SD       | Mixed model parameters | –                |
|                         | Plot id        | 0            | 0        | $R_m^2$                | 0.004            |
|                         | Residuals      | <0.001       | 0.008    | $R_c^2$                | 0.004            |
|                         | Fixed effects  | Estimate     | SE       | t                      | Pr(> t )         |
|                         | (Intercept)    | 0.373        | 0.001    | 335.910                | <b>&lt;0.001</b> |
|                         | Time           | 0.001        | 0.001    | 0.681                  | 0.497            |
| Functional divergence   | Random effects | Variance     | SD       | Mixed model parameters | –                |
|                         | Plot id        | <0.001       | 0.001    | $R_m^2$                | 0.026            |
|                         | Residuals      | 0.001        | 0.014    | $R_c^2$                | 0.038            |
|                         | Fixed effects  | Estimate     | SE       | t                      | Pr(> t )         |
|                         | (Intercept)    | 0.875        | 0.001    | 456.672                | <b>&lt;0.001</b> |
|                         | Time           | -0.004       | 0.002    | -1.729                 | 0.088            |
| CWM of ascomata area    | Random effects | Variance     | SD       | Mixed model parameters | –                |
|                         | Plot id        | 0.034        | 0.185    | $R_m^2$                | 0.001            |
|                         | Residuals      | 0.107        | 0.328    | $R_c^2$                | 0.243            |
|                         | Fixed effects  | Estimate     | SE       | t                      | Pr(> t )         |
|                         | (Intercept)    | 1.244        | 0.050    | 24.480                 | <b>&lt;0.001</b> |
|                         | Time           | 0.024        | 0.062    | 0.386                  | 0.737            |
| CWM of ascospore volume | Random effects | Variance     | SD       | Mixed model parameters | –                |
|                         | Plot id        | 4885665.000  | 2210.000 | $R_m^2$                | 0.001            |
|                         | Residuals      | 37603159.000 | 6132.000 | $R_c^2$                | 0.116            |
|                         | Fixed effects  | Estimate     | SE       | t                      | Pr(> t )         |
|                         | (Intercept)    | 9142.800     | 878.900  | 10.402                 | <b>&lt;0.001</b> |
|                         | Time           | 574.100      | 1169.400 | 0.491                  | 0.645            |
| CWM of ascospore shape  | Random effects | Variance     | SD       | Mixed model parameters | –                |
|                         | Plot id        | 0.008        | 0.0090   | $R_m^2$                | 0.005            |
|                         | Residuals      | 0.065        | 0.255    | $R_c^2$                | 0.115            |
|                         | Fixed effects  | Estimate     | SE       | t                      | Pr(> t )         |
|                         | (Intercept)    | 3.579        | 0.036    | 97.940                 | <b>&lt;0.001</b> |

|                            |                |          |        |                        |          |
|----------------------------|----------------|----------|--------|------------------------|----------|
|                            | Time           | -0.038   | 0.048  | -0.791                 | 0.457    |
| CWM of light WEIV          | Random effects | Variance | SD     | Mixed model parameters | –        |
|                            | Plot id        | 0.021    | 0.148  | $R_m^2$                | <0.001   |
|                            | Residuals      | 0.033    | 0.182  | $R_c^2$                | 0.396    |
|                            | Fixed effects  | Estimate | SE     | t                      | Pr(> t ) |
|                            | (Intercept)    | 4.838    | 0.031  | 152.533                | <0.001   |
|                            | Time           | 0.003    | 0.034  | 0.108                  | 0.933    |
| CWM of temperature WEIV    | Random effects | Variance | SD     | Mixed model parameters | –        |
|                            | Plot id        | 0.018    | 0.135  | $R_m^2$                | 0.001    |
|                            | Residuals      | 0.014    | 0.118  | $R_c^2$                | 0.565    |
|                            | Fixed effects  | Estimate | SE     | t                      | Pr(> t ) |
|                            | (Intercept)    | 5.092    | 0.024  | 209.923                | <0.001   |
|                            | Time           | 0.011    | 0.022  | 0.527                  | 0.729    |
| CWM of continentality WEIV | Random effects | Variance | SD     | Mixed model parameters | –        |
|                            | Plot id        | 0.021    | 0.146  | $R_m^2$                | 0.011    |
|                            | Residuals      | 0.019    | 0.139  | $R_c^2$                | 0.529    |
|                            | Fixed effects  | Estimate | SE     | t                      | Pr(> t ) |
|                            | (Intercept)    | 4.624    | 0.027  | 169.119                | <0.001   |
|                            | Time           | -0.042   | 0.026  | -1.607                 | 0.270    |
| CWM of moisture WEIV       | Random effects | Variance | SD     | Mixed model parameters | –        |
|                            | Plot id        | 0.004    | 0.064  | $R_m^2$                | 0.041    |
|                            | Residuals      | 0.012    | 0.113  | $R_c^2$                | 0.276    |
|                            | Fixed effects  | Estimate | SE     | t                      | Pr(> t ) |
|                            | (Intercept)    | 4.268    | 0.0174 | 241.923                | <0.001   |
|                            | Time           | -0.053   | 0.021  | -2.487                 | 0.033    |
| CWM of nitrogen WEIV       | Random effects | Variance | SD     | Mixed model parameters | –        |
|                            | Plot id        | 0.008    | 0.094  | $R_m^2$                | 0.268    |
|                            | Residuals      | 0.016    | 0.127  | $R_c^2$                | 0.526    |
|                            | Fixed effects  | Estimate | SE     | t                      | Pr(> t ) |
|                            | (Intercept)    | 3.089    | 0.021  | 144.400                | <0.001   |
|                            | Time           | 0.191    | 0.024  | 7.870                  | <0.001   |
| Shannon index              | Random effects | Variance | SD     | Mixed model parameters | –        |
|                            | Plot id        | 0.003    | 0.054  | $R_m^2$                | 0.573    |
|                            | Residuals      | 0.027    | 0.166  | $R_c^2$                | 0.614    |
|                            | Fixed effects  | Estimate | SE     | t                      | Pr(> t ) |
|                            | (Intercept)    | 3.623    | 0.023  | 153.570                | <0.001   |
|                            | Time           | 0.403    | 0.031  | 12.730                 | <0.001   |

|                  | Random effects | Variance | SD    | Mixed model parameters | –                |
|------------------|----------------|----------|-------|------------------------|------------------|
| Species richness | Plot id        | 0.004    | 0.068 | $R_m^2$                | 0.638            |
|                  |                |          |       | $R_c^2$                | 0.710            |
|                  | Fixed effects  | Estimate | SE    | z                      | Pr(> z )         |
|                  | (Intercept)    | 3.727    | 0.022 | 162.98                 | <b>&lt;0.001</b> |
|                  | Time           | 0.409    | 0.026 | 15.190                 | <b>&lt;0.001</b> |

**Table S5.** Parameters of mixed effect models showing temporal shifts in lichen species' functional diversity components, community weighted means of functional traits, Shannon index and species richness regarding wet forest communities. For testing shifts in species richness over time, the generalized mixed effects model with Poisson distribution was employed, while regarding remaining parameters of lichen species composition the linear mixed models were used. Note that regarding functional evenness, functional divergence and spore volume, the model assumptions were not met due to the very small variance of random effects. Abbreviations: CWM – community weighted mean; WEIV – Wirth ecological indicator value. Significant results are in **bold**.

|                       | Random effects | Variance | SD    | Mixed model parameters | –                |
|-----------------------|----------------|----------|-------|------------------------|------------------|
| Functional richness   | Plot id        | 0.321    | 0.567 | $R_m^2$                | 0.743            |
|                       | Residuals      | 0.829    | 0.206 | $R_c^2$                | 0.815            |
|                       | Fixed effects  | Estimate | SE    | t                      | Pr(> t )         |
|                       | (Intercept)    | 6.301    | 0.171 | 36.670                 | <b>&lt;0.001</b> |
|                       | Time           | 3.631    | 0.206 | 17.600                 | <b>&lt;0.001</b> |
|                       | Random effects | Variance | SD    | Mixed model parameters | –                |
| Functional evenness   | Plot id        | 0        | 0     | $R_m^2$                | 0.127            |
|                       | Residuals      | <0.001   | 0.012 | $R_c^2$                | 0.127            |
|                       | Fixed effects  | Estimate | SE    | t                      | Pr(> t )         |
|                       | (Intercept)    | 0.866    | 0.002 | 422.964                | <b>&lt;0.001</b> |
|                       | Time           | -0.009   | 0.002 | -3.357                 | <b>0.001</b>     |
|                       | Random effects | Variance | SD    | Mixed model parameters | –                |
| Functional dispersion | Plot id        | <0.001   | 0.007 | $R_m^2$                | 0.017            |
|                       | Residuals      | <0.001   | 0.009 | $R_c^2$                | 0.445            |
|                       | Fixed effects  | Estimate | SE    | t                      | Pr(> t )         |
|                       | (Intercept)    | 0.371    | 0.001 | 193.045                | <b>&lt;0.001</b> |
|                       | Time           | 0.003    | 0.002 | 1.577                  | 0.240            |
|                       | Random effects | Variance | SD    | Mixed model parameters | –                |
| Functional divergence | Plot id        | 0        | 0     | $R_m^2$                | <0.001           |
|                       | Residuals      | <0.001   | 0.014 | $R_c^2$                | <0.001           |
|                       | Fixed effects  | Estimate | SE    | t                      | Pr(> t )         |
|                       | (Intercept)    | 0.873    | 0.002 | 388.947                | <b>&lt;0.001</b> |
|                       | Time           | <-0.001  | 0.003 | -0.111                 | 0.912            |
|                       | Random effects | Variance | SD    | Mixed model parameters | –                |
| CWM of ascomata area  | Plot id        | 0.041    | 0.203 | $R_m^2$                | 0.004            |

|                            |                |              |          |                        |                  |
|----------------------------|----------------|--------------|----------|------------------------|------------------|
|                            | Residuals      | 0.228        | 0.477    | $R_c^2$                | 0.156            |
|                            | Fixed effects  | Estimate     | SE       | t                      | Pr(> t )         |
|                            | (Intercept)    | 1.502        | 0.083    | 18.079                 | <b>&lt;0.001</b> |
|                            | Time           | 0.064        | 0.108    | 0.599                  | 0.583            |
|                            | Random effects | Variance     | SD       | Mixed model parameters |                  |
| CWM of ascospore volume    | Plot id        | 0            | 0        | $R_m^2$                | 0.030            |
|                            | Residuals      | 26857179.000 | 5182.000 | $R_c^2$                | 0.030            |
|                            | Fixed effects  | Estimate     | SE       | t                      | Pr(> t )         |
|                            | (Intercept)    | 4355.600     | 829.800  | 5.249                  | <b>&lt;0.001</b> |
|                            | Time           | 1825.000     | 1173.600 | 1.555                  | 0.124            |
| CWM of ascospore shape     | Random effects | Variance     | SD       | Mixed model parameters |                  |
|                            | Plot id        | 0.023        | 0.154    | $R_m^2$                | 0.121            |
|                            | Residuals      | 0.077        | 0.277    | $R_c^2$                | 0.329            |
|                            | Fixed effects  | Estimate     | SE       | t                      | Pr(> t )         |
|                            | (Intercept)    | 3.627        | 0.050    | 71.302                 | <b>&lt;0.001</b> |
| CWM of light WEIV          | Time           | -0.234       | 0.062    | -3.733                 | <b>0.001</b>     |
|                            | Random effects | Variance     | SD       | Mixed model parameters |                  |
|                            | Plot id        | 0.012        | 0.113    | $R_m^2$                | 0.134            |
|                            | Residuals      | 0.036        | 0.191    | $R_c^2$                | 0.360            |
|                            | Fixed effects  | Estimate     | SE       | t                      | Pr(> t )         |
| CWM of temperature WEIV    | (Intercept)    | 4.828        | 0.035    | 135.469                | <b>&lt;0.001</b> |
|                            | Time           | 0.174        | 0.043    | 4.024                  | <b>&lt;0.001</b> |
|                            | Random effects | Variance     | SD       | Mixed model parameters |                  |
|                            | Plot id        | 0.028        | 0.168    | $R_m^2$                | 0.015            |
|                            | Residuals      | 0.012        | 0.110    | $R_c^2$                | 0.705            |
| CWM of continentality WEIV | Fixed effects  | Estimate     | SE       | t                      | Pr(> t )         |
|                            | (Intercept)    | 4.981        | 0.032    | 154.604                | <b>&lt;0.001</b> |
|                            | Time           | -0.050       | 0.024    | -2.038                 | 0.268            |
|                            | Random effects | Variance     | SD       | Mixed model parameters |                  |
|                            | Plot id        | 0.018        | 0.137    | $R_m^2$                | 0.031            |
| CWM of moisture WEIV       | Residuals      | 0.023        | 0.154    | $R_c^2$                | 0.460            |
|                            | Fixed effects  | Estimate     | SE       | t                      | Pr(> t )         |
|                            | (Intercept)    | 4.671        | 0.033    | 141.318                | <b>&lt;0.001</b> |
|                            | Time           | 0.074        | 0.034    | 2.134                  | 0.115            |
|                            | Random effects | Variance     | SD       | Mixed model parameters |                  |
|                            | Plot id        | <0.001       | 0.031    | $R_m^2$                | 0.105            |
|                            | Residuals      | 0.015        | 0.125    | $R_c^2$                | 0.158            |

|                      |                |          |       |                        |                |
|----------------------|----------------|----------|-------|------------------------|----------------|
| CWM of nitrogen WEIV | Fixed effects  | Estimate | SE    | t                      | Pr(> t )       |
|                      | (Intercept)    | 4.336    | 0.020 | 209.450                | < <b>0.001</b> |
|                      | Time           | -0.090   | 0.028 | -3.106                 | <b>0.003</b>   |
|                      | Random effects | Variance | SD    | Mixed model parameters |                |
|                      | Plot id        | 0.003    | 0.056 | $R_m^2$                | 0.433          |
|                      | Residuals      | 0.019    | 0.139 | $R_c^2$                | 0.511          |
|                      | Fixed effects  | Estimate | SE    | t                      | Pr(> t )       |
|                      | (Intercept)    | 3.065    | 0.024 | 126.983                | < <b>0.001</b> |
|                      | Time           | 0.262    | 0.031 | 8.267                  | < <b>0.001</b> |
|                      | Random effects | Variance | SD    | Mixed model parameters |                |
| Shannon index        | Plot id        | 0.005    | 0.075 | $R_m^2$                | 0.788          |
|                      | Residuals      | 0.012    | 0.110 | $R_c^2$                | 0.856          |
|                      | Fixed effects  | Estimate | SE    | t                      | Pr(> t )       |
|                      | (Intercept)    | 3.577    | 0.021 | 166.720                | < <b>0.001</b> |
|                      | Time           | 0.514    | 0.025 | 0.025                  | < <b>0.001</b> |
|                      | Random effects | Variance | SD    | Mixed model parameters |                |
| Species richness     | Plot id        | 0.002    | 0.046 | $R_m^2$<br>$R_c^2$     | 0.772<br>0.795 |
|                      | Fixed effects  | Estimate | SE    | z                      | Pr(> z )       |
|                      | (Intercept)    | 3.672    | 0.026 | 138.040                | < <b>0.001</b> |
|                      | Time           | 0.530    | 0.031 | 16.490                 | < <b>0.001</b> |
|                      | Random effects | Variance | SD    | Mixed model parameters |                |
|                      | Plot id        | 0.002    | 0.046 | $R_m^2$<br>$R_c^2$     | 0.772<br>0.795 |

**Table S6.** Parameters of variables passively fitted to results of the DCA ordinations showing temporal shifts in composition of lichen species at tree phorophyte and substrate levels. Determination coefficients  $R^2$  and P-values were estimated using permutation tests with 999 iterations. Note the presence-absence data transformation prior to DCAs. Abbreviations: CWM – community weighted mean; WEIV – Wirth ecological indicator value. Significant results are in **bold**.

| Parameter                  | Code    | DCA1   | DCA2   | $R^2$ | P            |
|----------------------------|---------|--------|--------|-------|--------------|
| Tree phoropytes:           |         |        |        |       |              |
| Functional richness        | FRic    | -0.567 | -0.823 | 0.536 | <b>0.001</b> |
| Functional evenness        | FEve    | -0.332 | 0.943  | 0.070 | 0.470        |
| Functional dispersion      | FDis    | -0.972 | -0.234 | 0.624 | <b>0.001</b> |
| Functional divergence      | FDiv    | -0.979 | -0.201 | 0.301 | <b>0.027</b> |
| CWM of ascomata area       | AscArea | -0.167 | -0.985 | 0.406 | <b>0.006</b> |
| CWM of ascospore volume    | SporVol | -0.896 | -0.442 | 0.363 | <b>0.012</b> |
| CWM of ascospore shape     | SporShp | -0.992 | -0.124 | 0.177 | 0.123        |
| CWM of light WEIV          | WEIV.L  | 0.999  | -0.037 | 0.466 | <b>0.001</b> |
| CWM of temperature WEIV    | WEIV.T  | -0.977 | 0.211  | 0.765 | <b>0.001</b> |
| CWM of continentality WEIV | WEIV.C  | 0.993  | -0.110 | 0.827 | <b>0.001</b> |
| CWM of moisture WEIV       | WEIV.M  | -0.641 | -0.767 | 0.042 | 0.631        |

|                            |         |        |        |       |              |
|----------------------------|---------|--------|--------|-------|--------------|
| CWM of nitrogen WEIV       | WEIV.N  | -0.831 | -0.554 | 0.200 | 0.100        |
| Shannon index              | Shan    | -0.441 | -0.897 | 0.388 | <b>0.005</b> |
| Species richness           | Rich    | -0.372 | -0.928 | 0.510 | <b>0.001</b> |
| Substrates:                |         |        |        |       |              |
| Functional richness        | FRic    | -0.773 | -0.634 | 0.511 | <b>0.009</b> |
| Functional evenness        | FEve    | 0.997  | 0.068  | 0.345 | 0.074        |
| Functional dispersion      | FDis    | -0.504 | -0.863 | 0.513 | <b>0.008</b> |
| Functional divergence      | FDiv    | -0.984 | 0.177  | 0.150 | 0.338        |
| CWM of ascomata area       | AscArea | -0.409 | 0.912  | 0.298 | 0.111        |
| CWM of ascospore volume    | SporVol | -0.907 | -0.419 | 0.553 | <b>0.005</b> |
| CWM of ascospore shape     | SporShp | -0.682 | -0.730 | 0.260 | 0.128        |
| CWM of light WEIV          | WEIV.L  | 0.109  | 0.993  | 0.608 | <b>0.004</b> |
| CWM of temperature WEIV    | WEIV.T  | -0.811 | -0.584 | 0.633 | <b>0.001</b> |
| CWM of continentality WEIV | WEIV.C  | 0.691  | 0.721  | 0.685 | <b>0.001</b> |
| CWM of moisture WEIV       | WEIV.M  | -0.096 | -0.995 | 0.245 | 0.171        |
| CWM of nitrogen WEIV       | WEIV.N  | -0.340 | 0.940  | 0.779 | <b>0.001</b> |
| Shannon index              | Shan    | -0.990 | -0.139 | 0.422 | <b>0.037</b> |
| Species richness           | Rich    | -0.998 | -0.051 | 0.377 | 0.050        |
